# Supplementary material for: Regioselective synthesis, X-ray structure, and reactivity of a tricyclic tetrasulfone, 1,3,5,7-tetramethyl-2,4,6,8,9,10-hexathiatricyclo[3.3.1.13,7]decane 2,2,4,4,6,6,8,8-octaoxide, derived from tetramethylhexathiaadamantane †
Source: Royal Society of Chemistry journal article supplement (doi:10.1039/b004911p), 2000-01-01
Supplement: b004911p.doc [file b004911p.doc]

Supplementary data

**Regioselective synthesis, X-ray structure, and reactivity of a tricyclic tetrasulfone, 1,3,5,7-tetramethyl-2,4,6,8,9,10-hexathiatricyclo[3.3.1.13,7]decane-2,2,4,4,6,6,8,8-octaoxide, derived from tetramethylhexathiaadamantane**

**Glen P. Miller,**a* Ingyu Jeon,*ac* A. Nikki Faix,*a* Jerry P. Jasinski,*b* Andreas J. Athans*a* and Mark C. Tetreau*a***

*a*  *Department of Chemistry, University of New Hampshire, Durham, NH 03824-3598 USA. E-mail: gpm@cisunix.unh.edu*

*b Department of Chemistry, Keene State College, Keene, NH 03435-2001 USA*

*c Current address: Pharm-eco Inc., Lexington, MA USA*

**Analytical data for compounds 1, 7, 9–11**

**
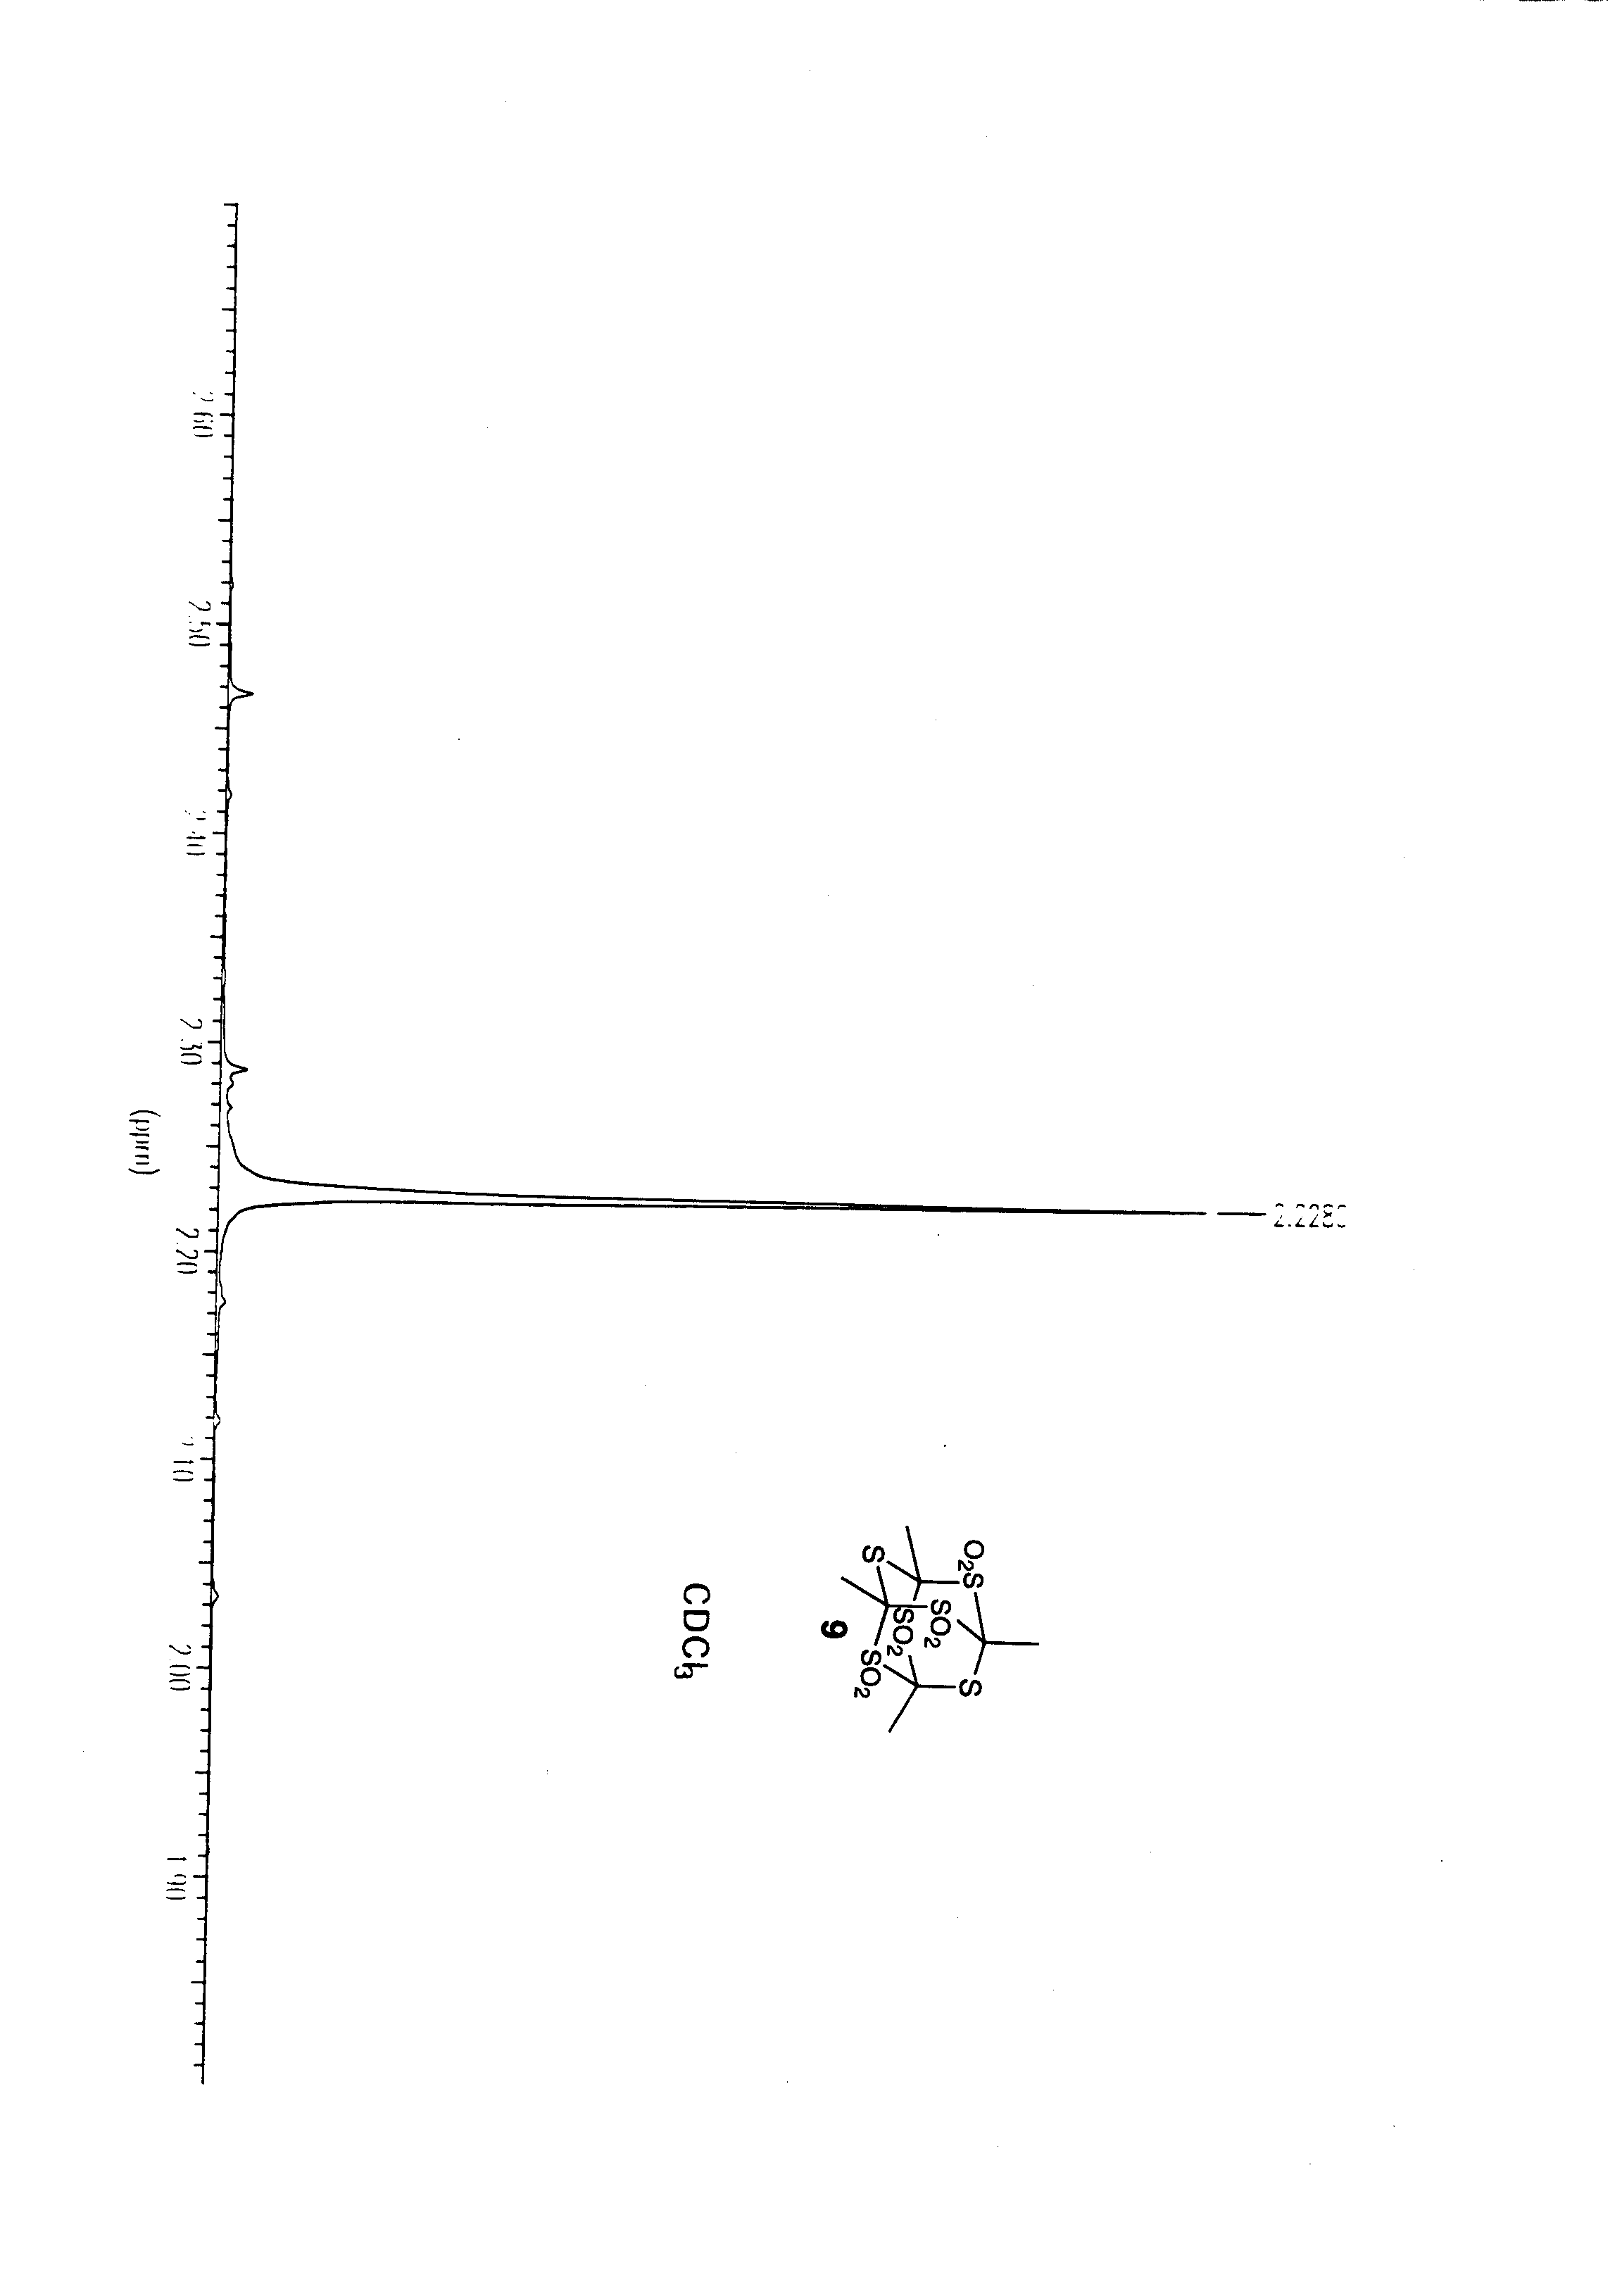
**

**
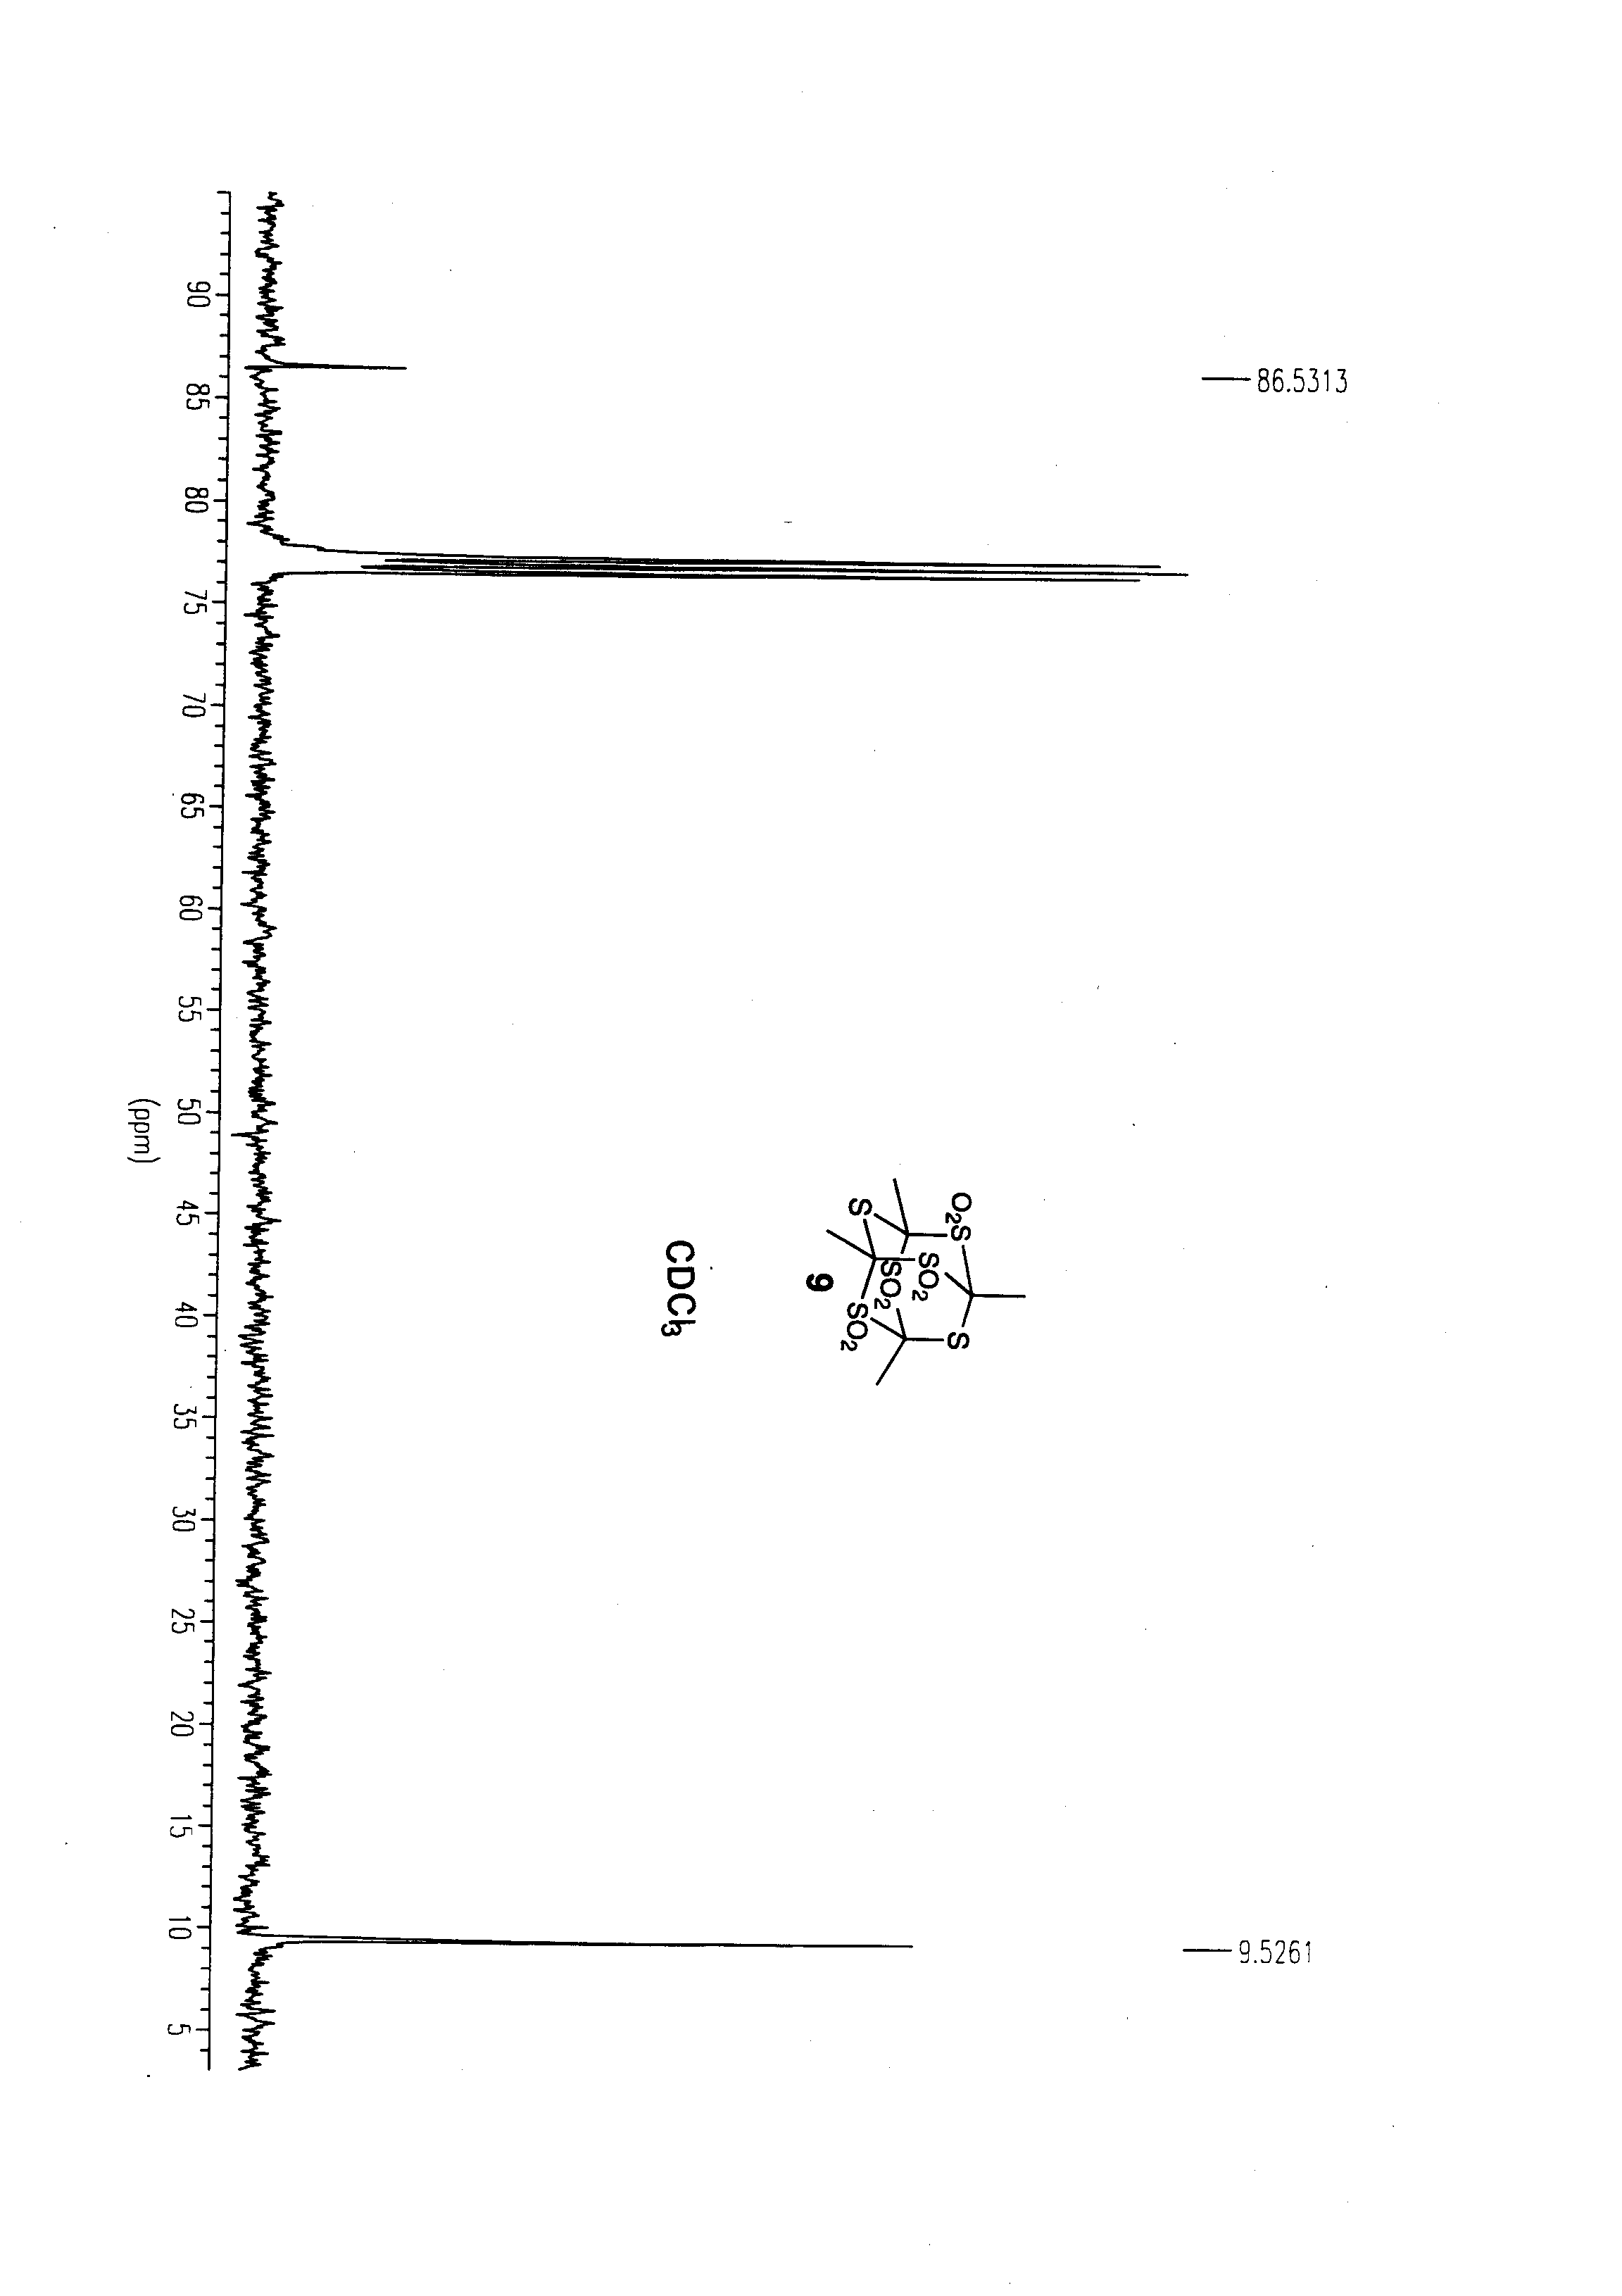
**

**
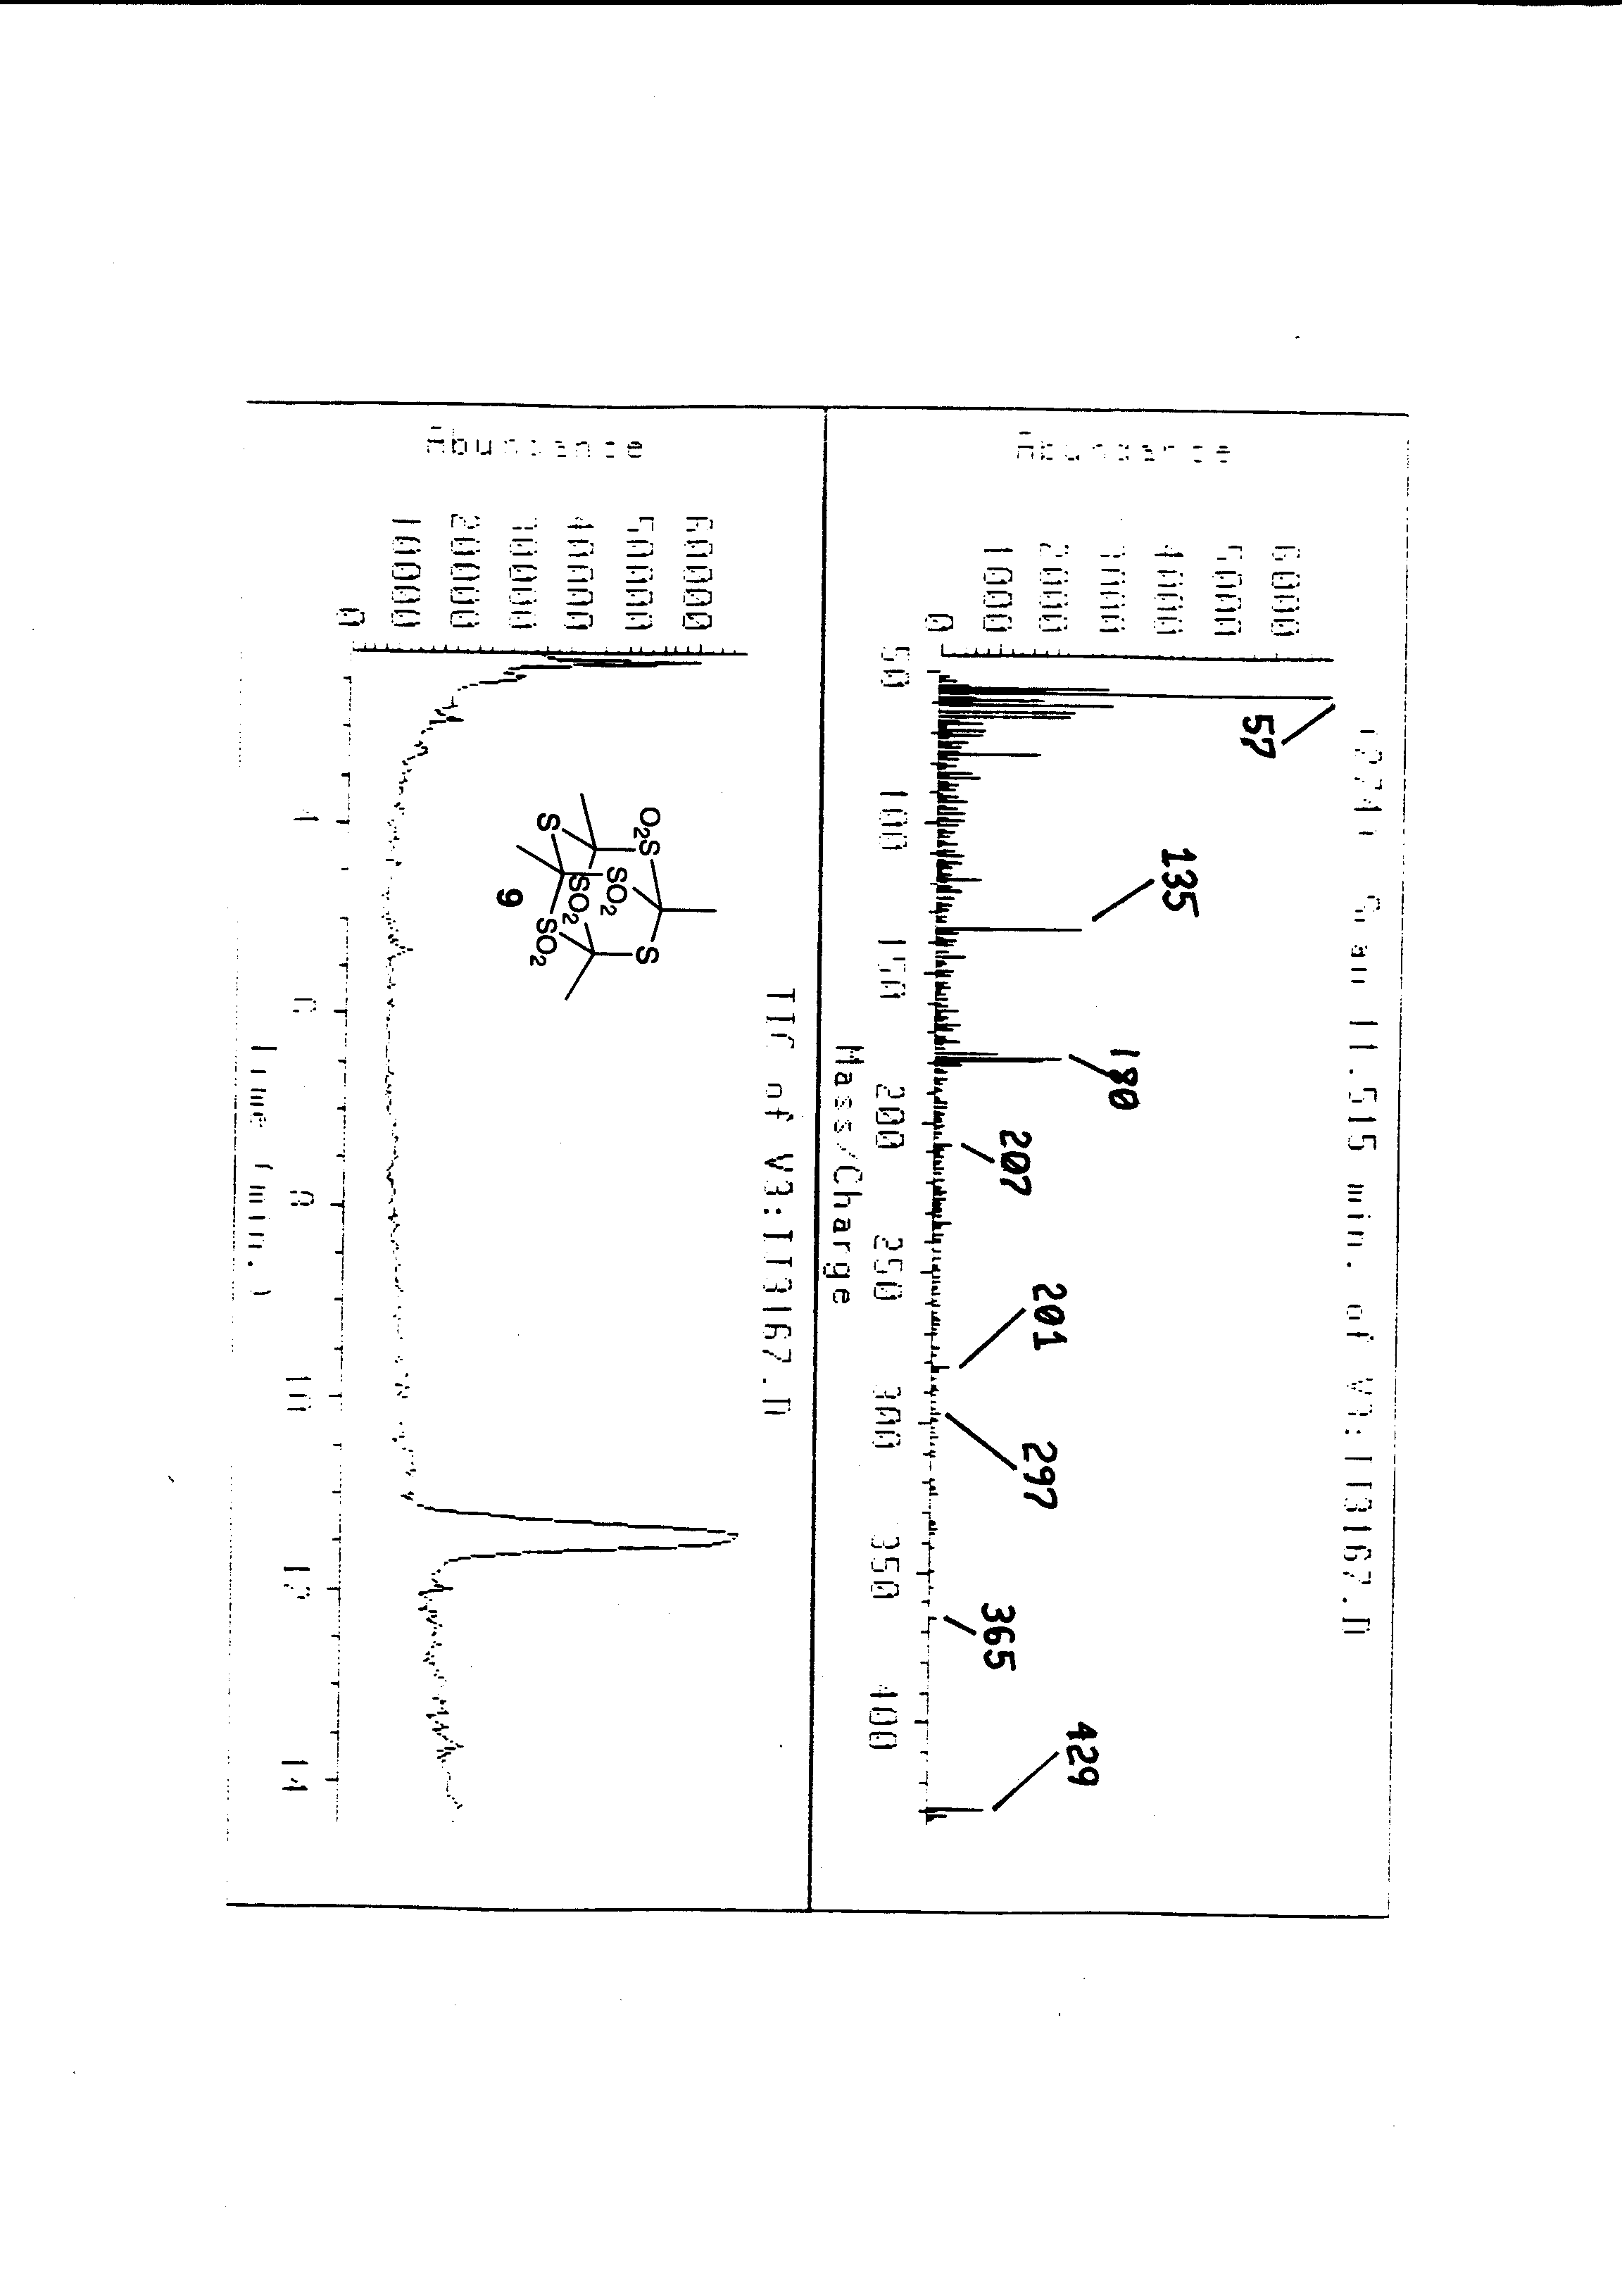
**

**
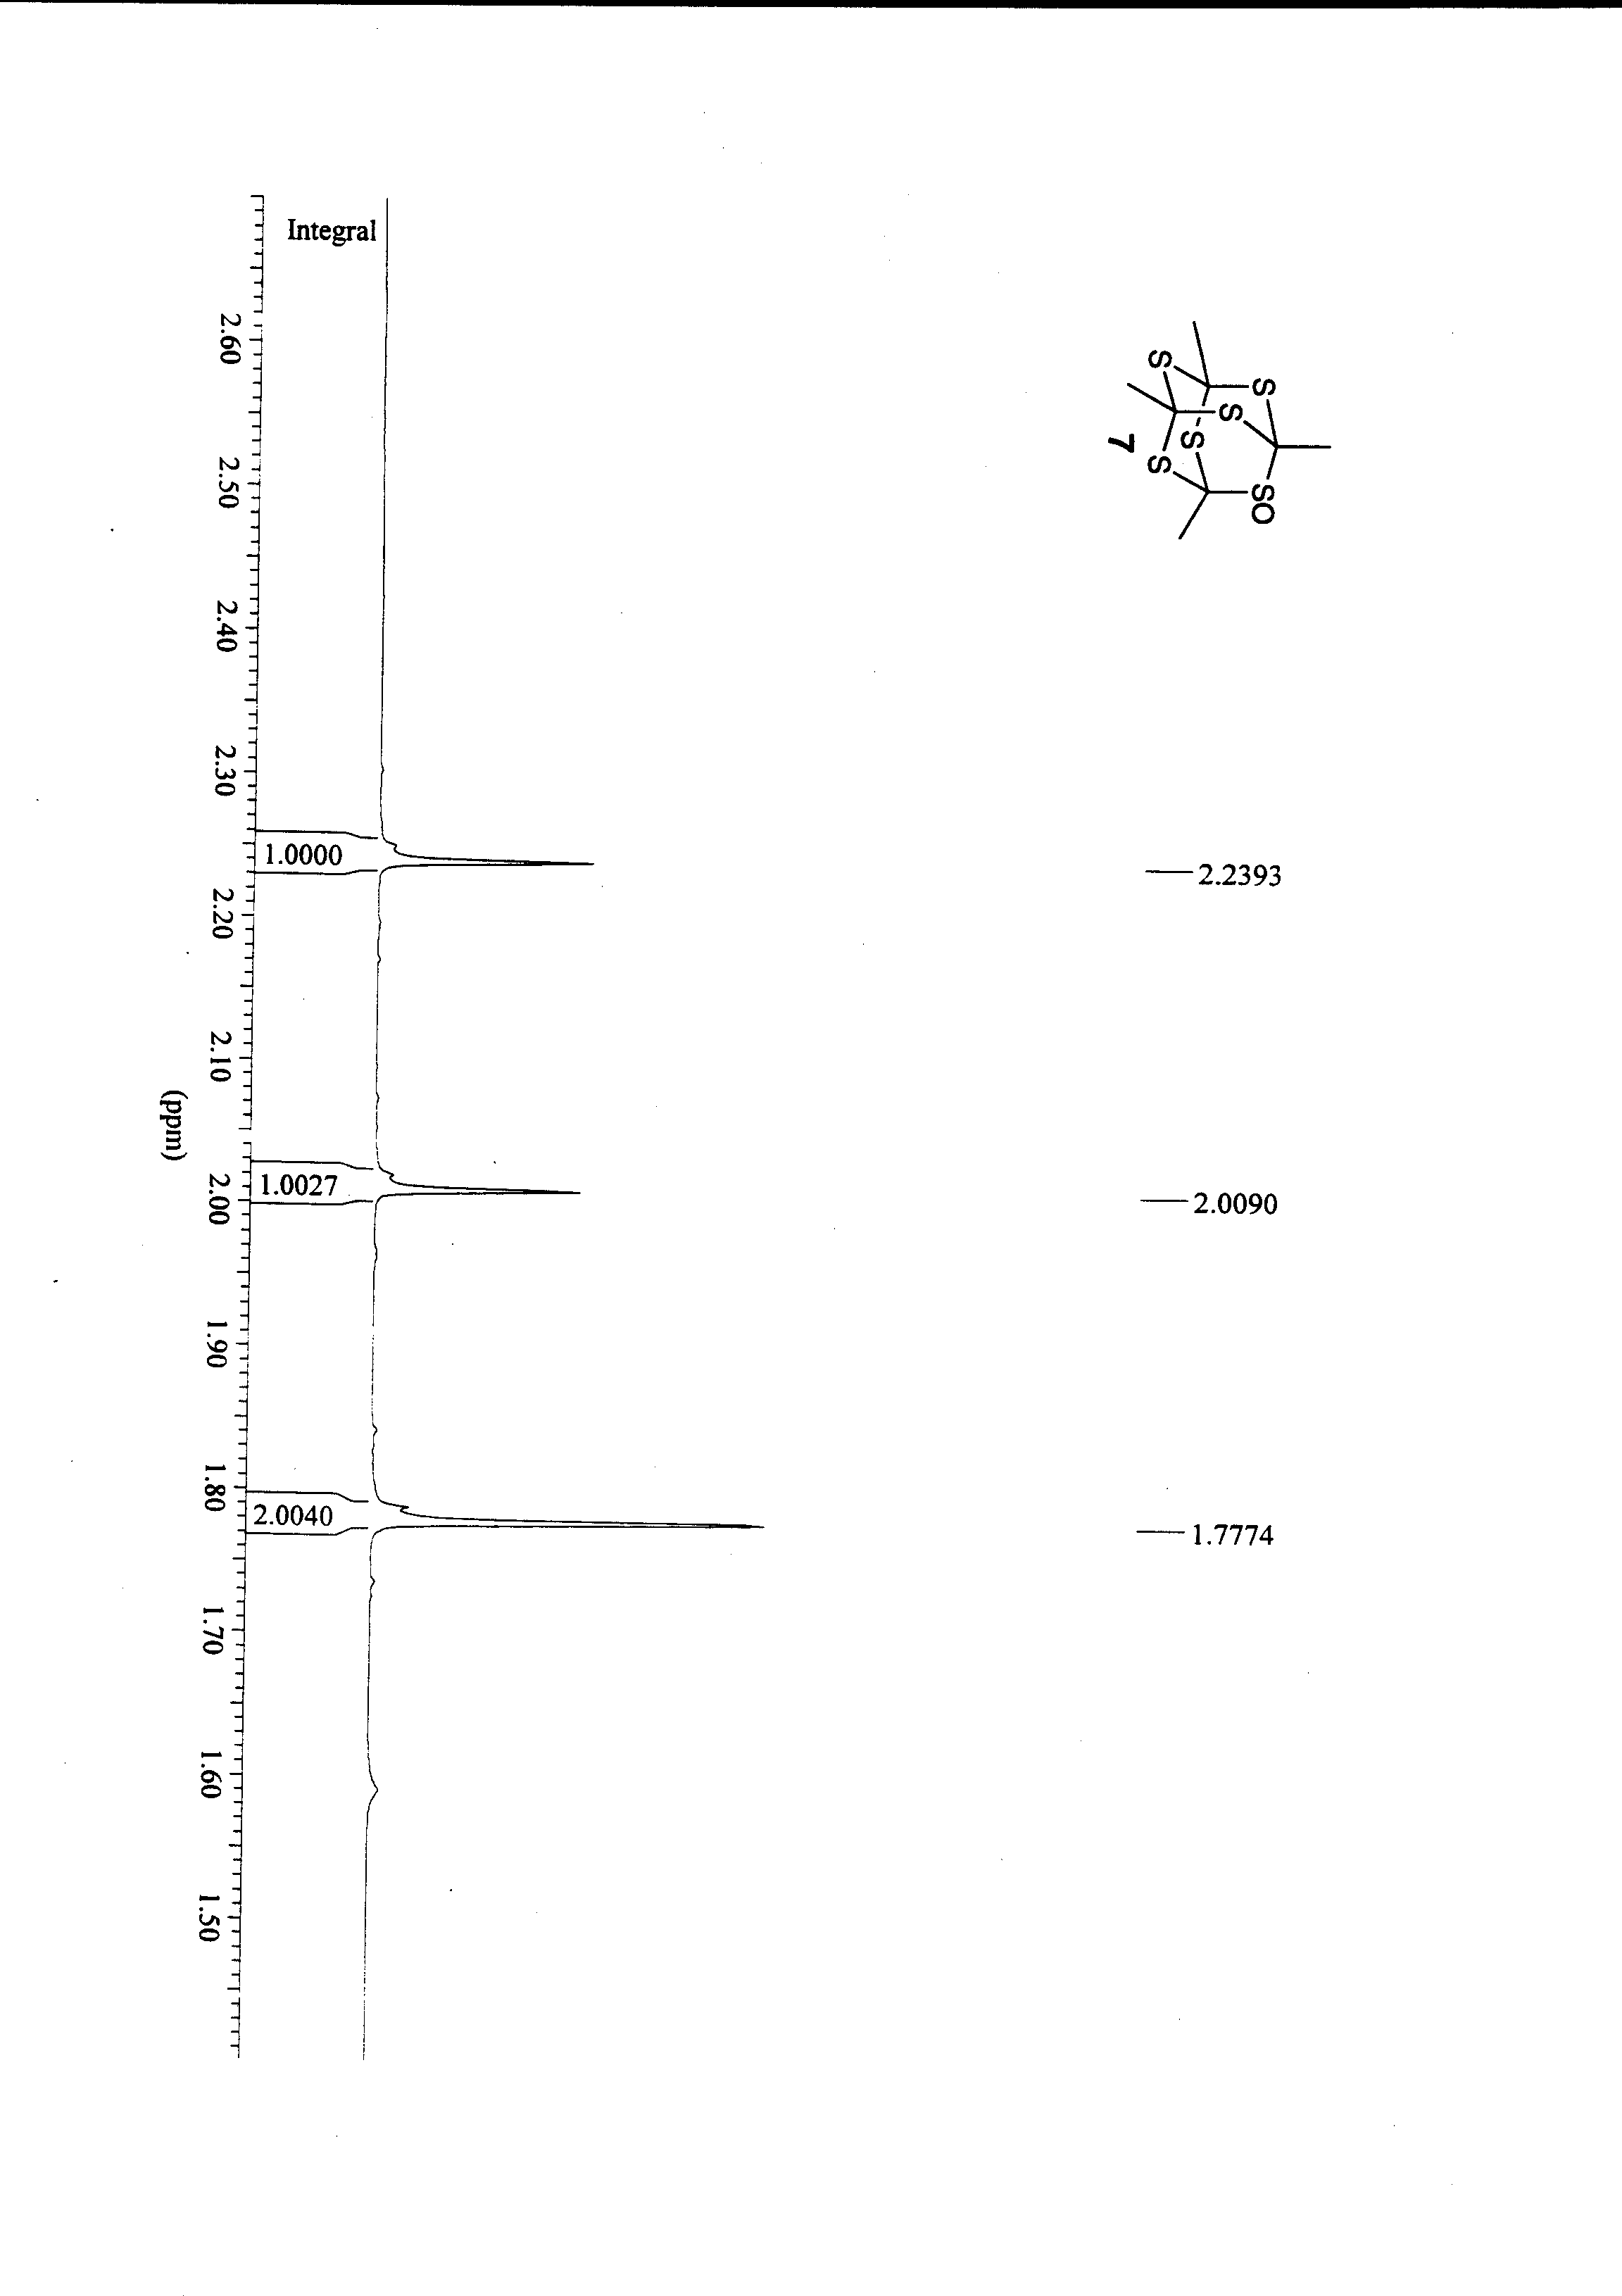
**

**
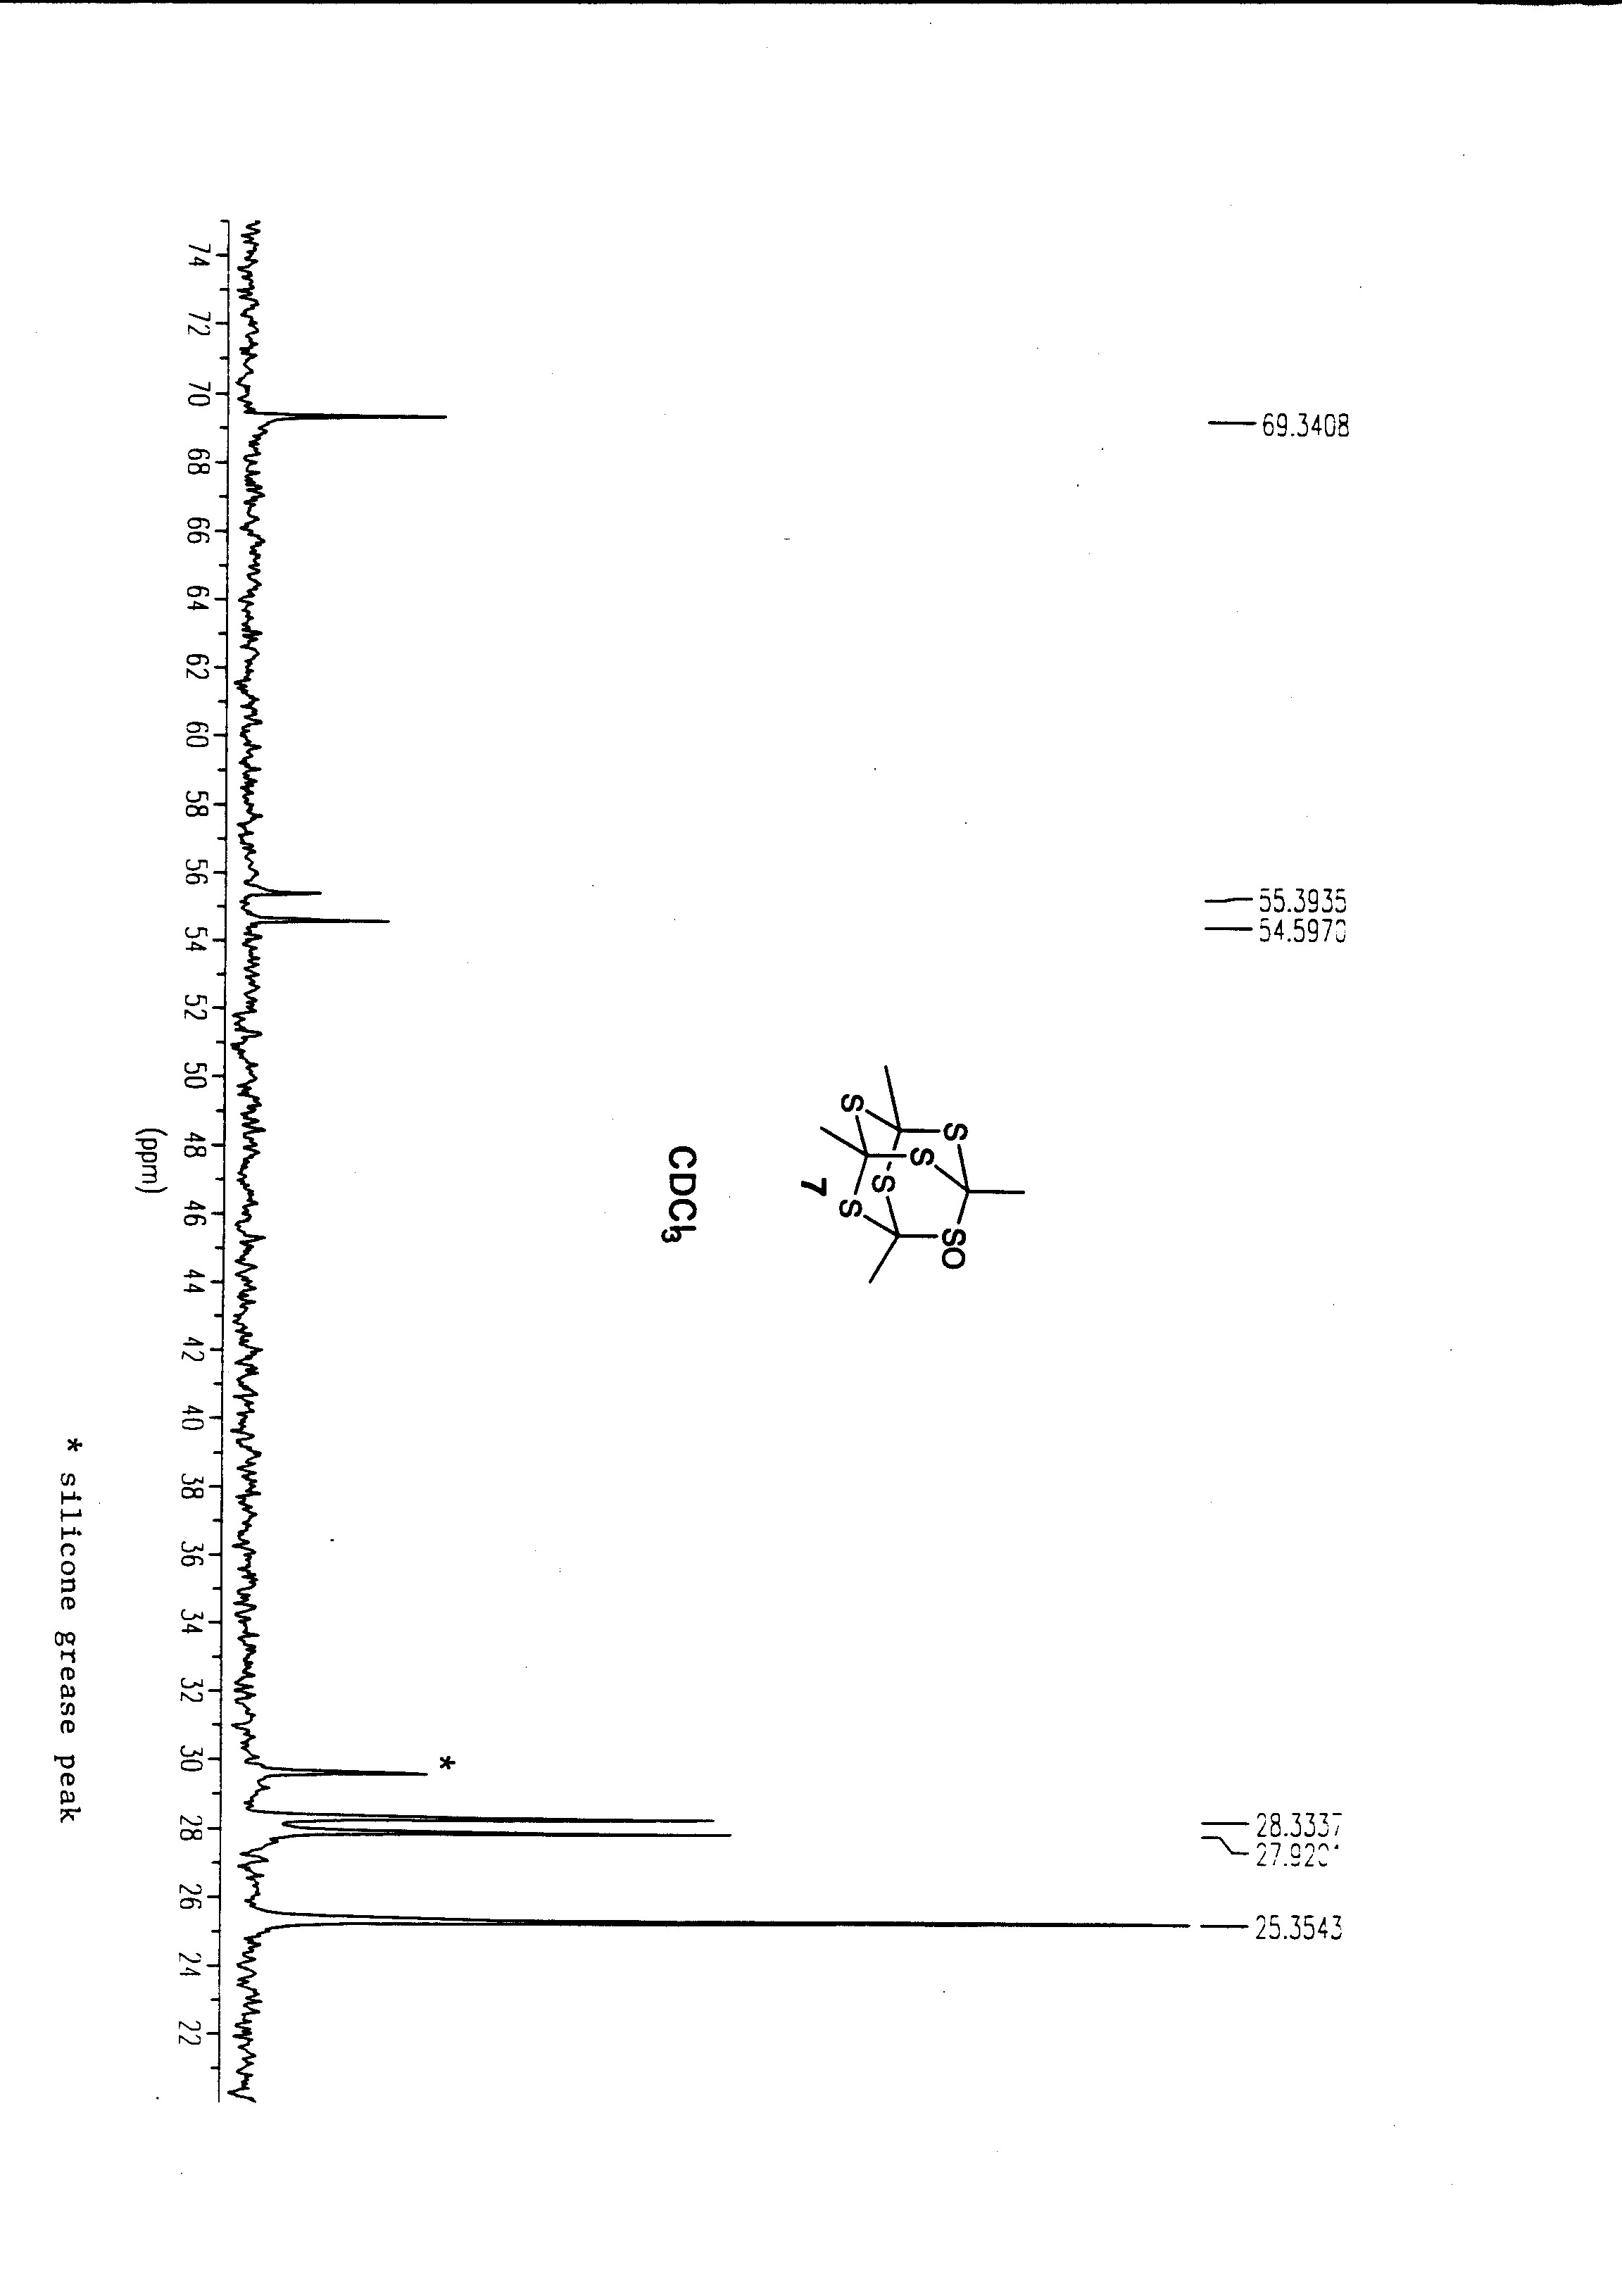
**

**
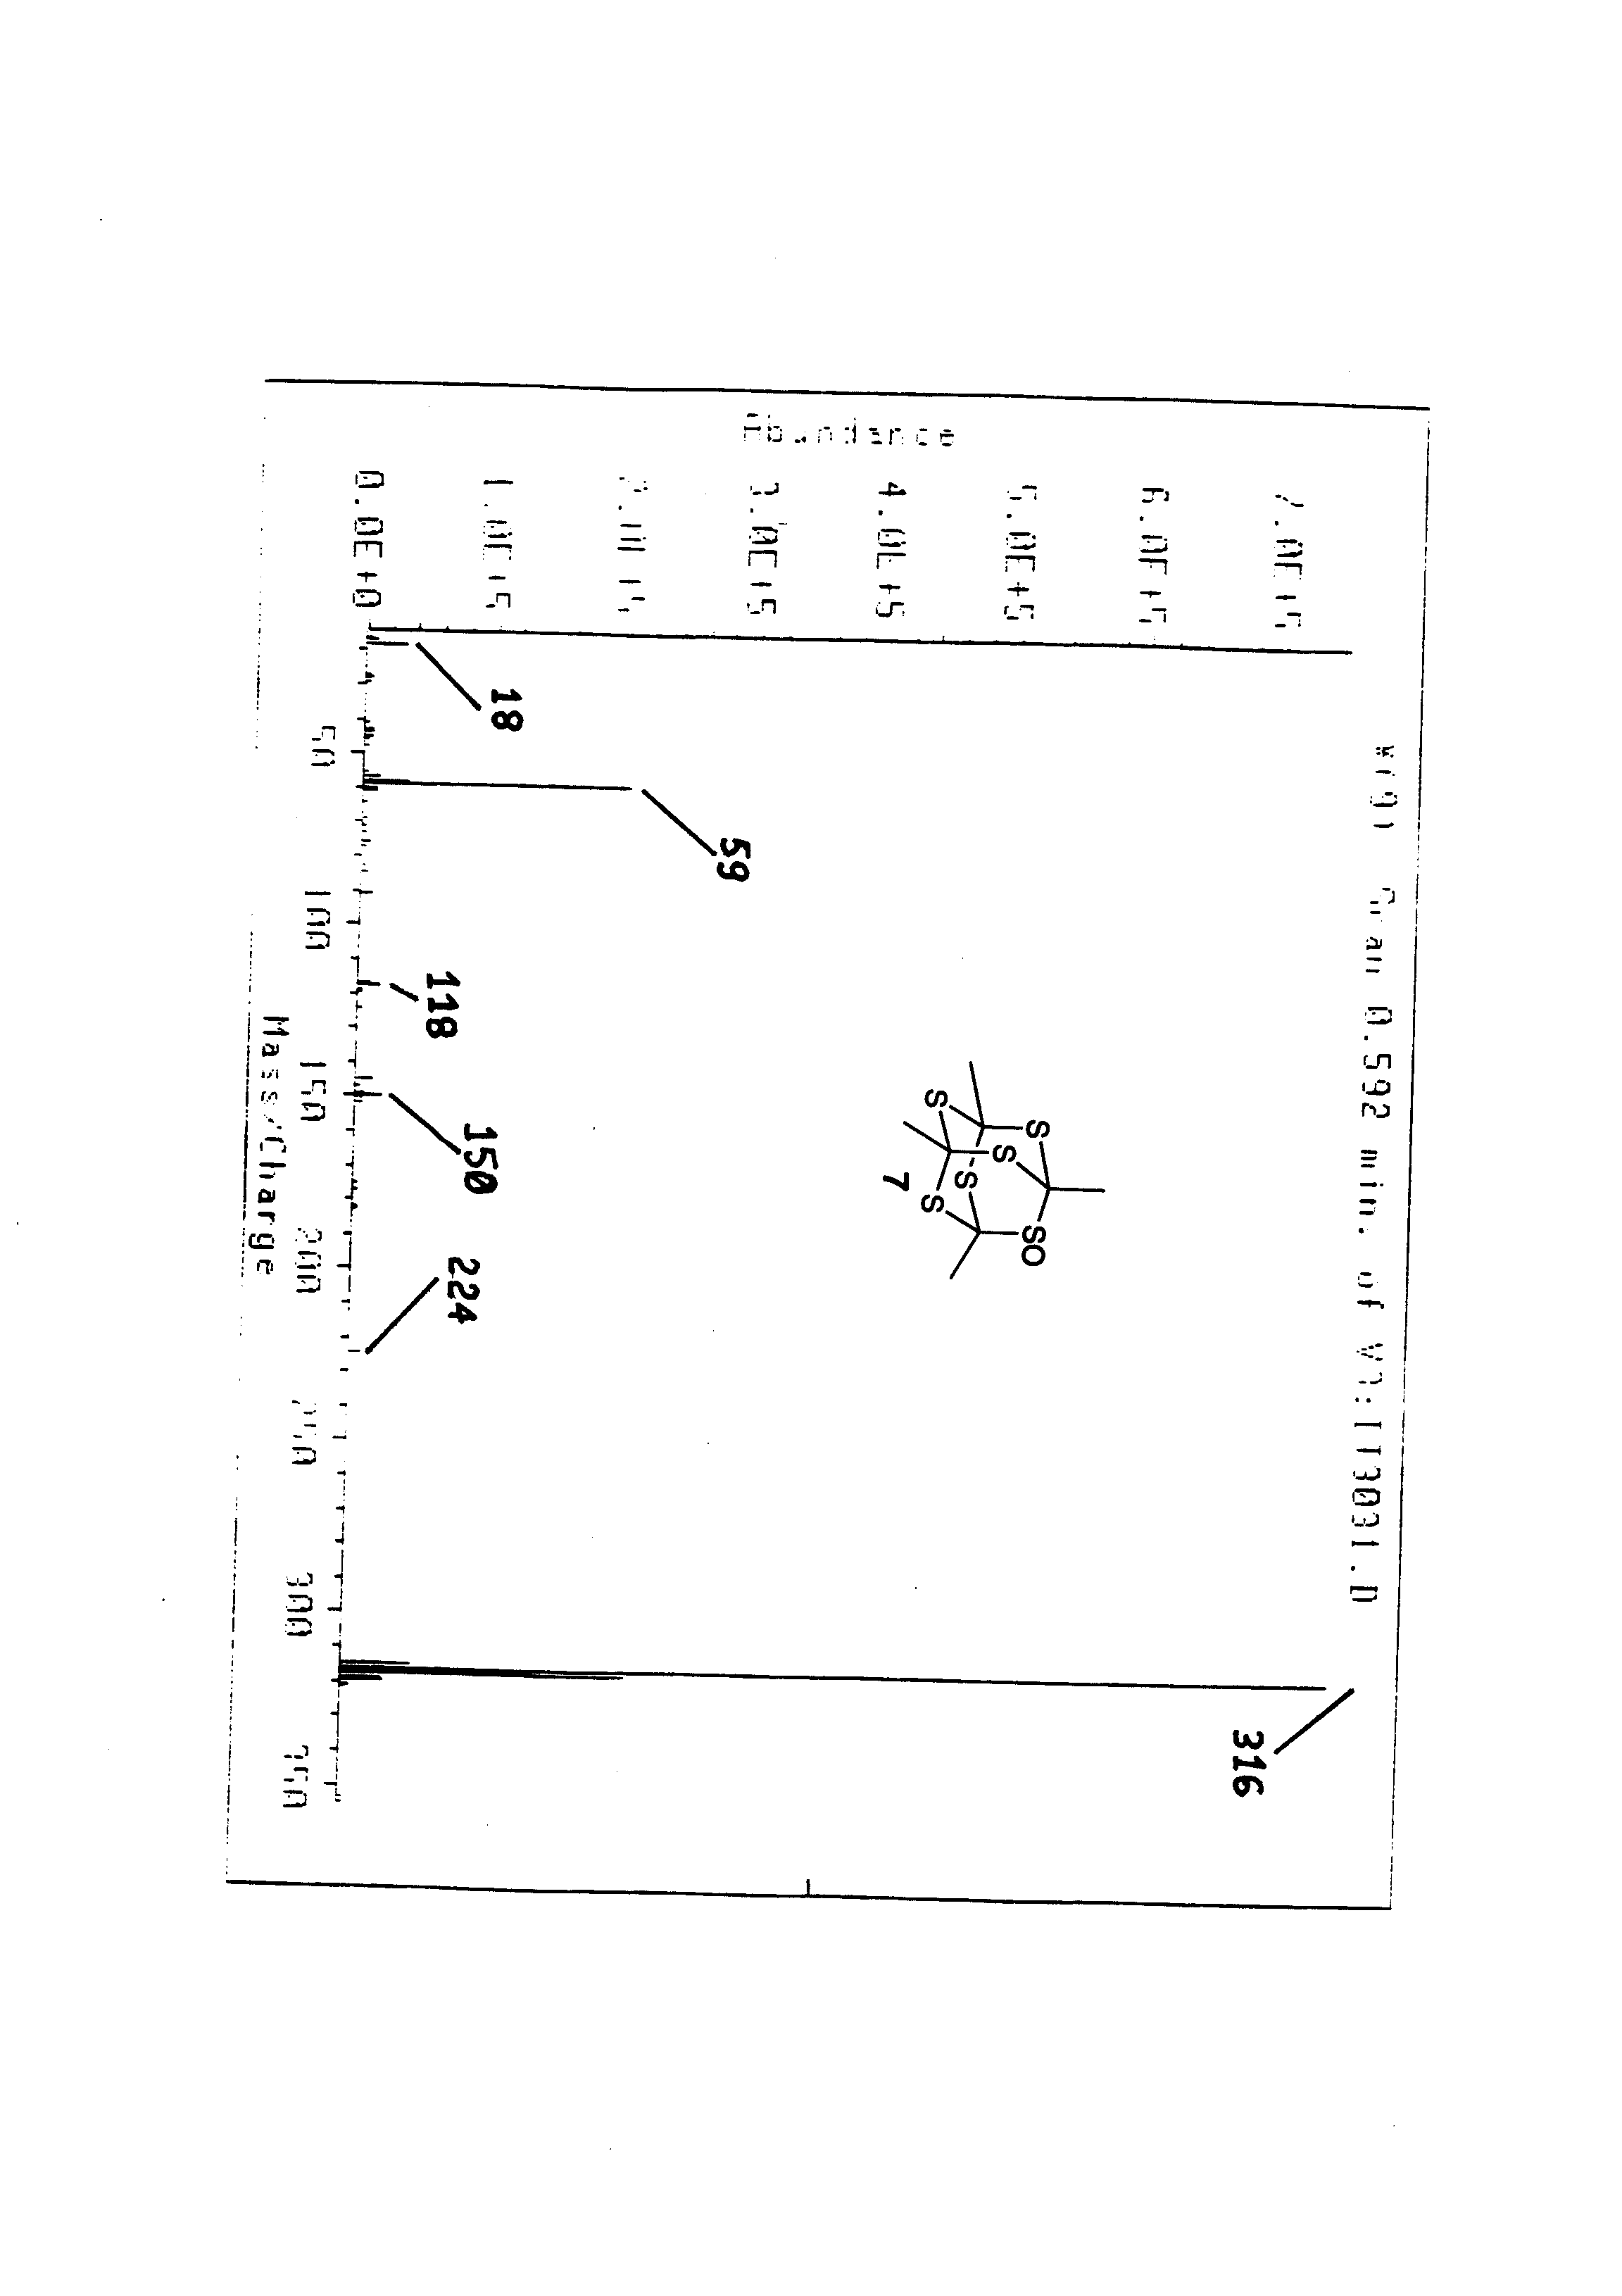
**

**
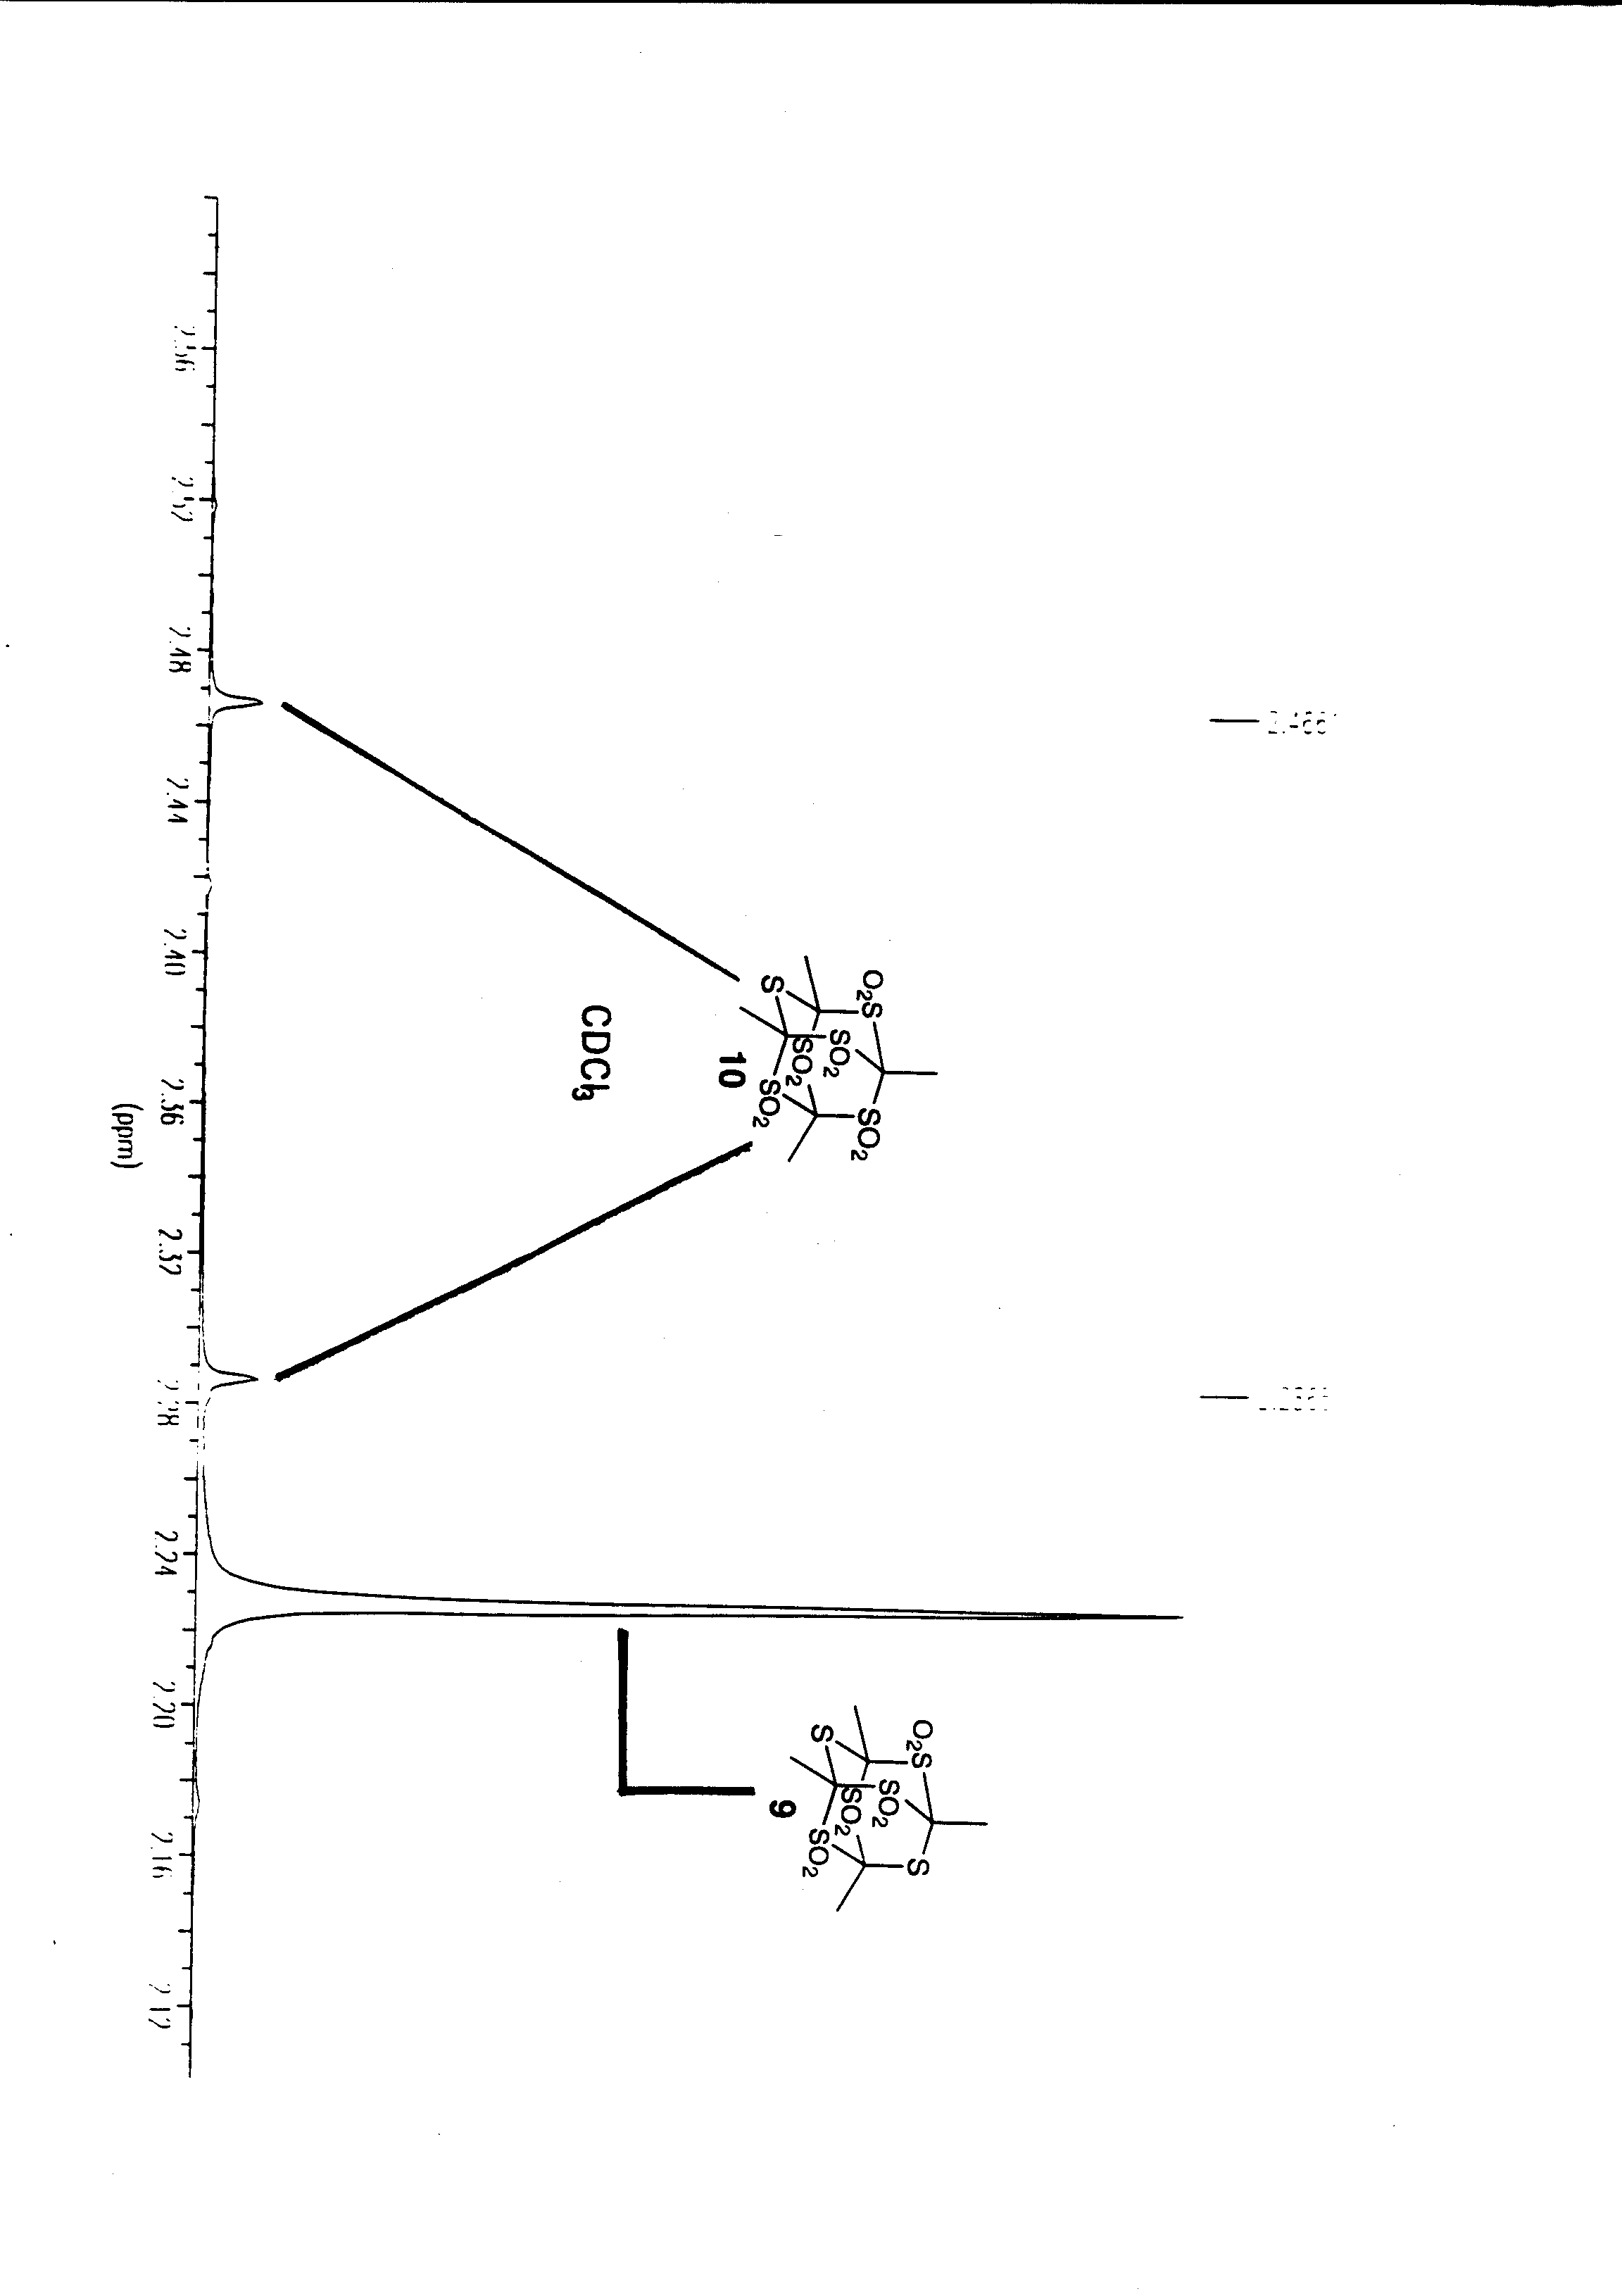
**

**
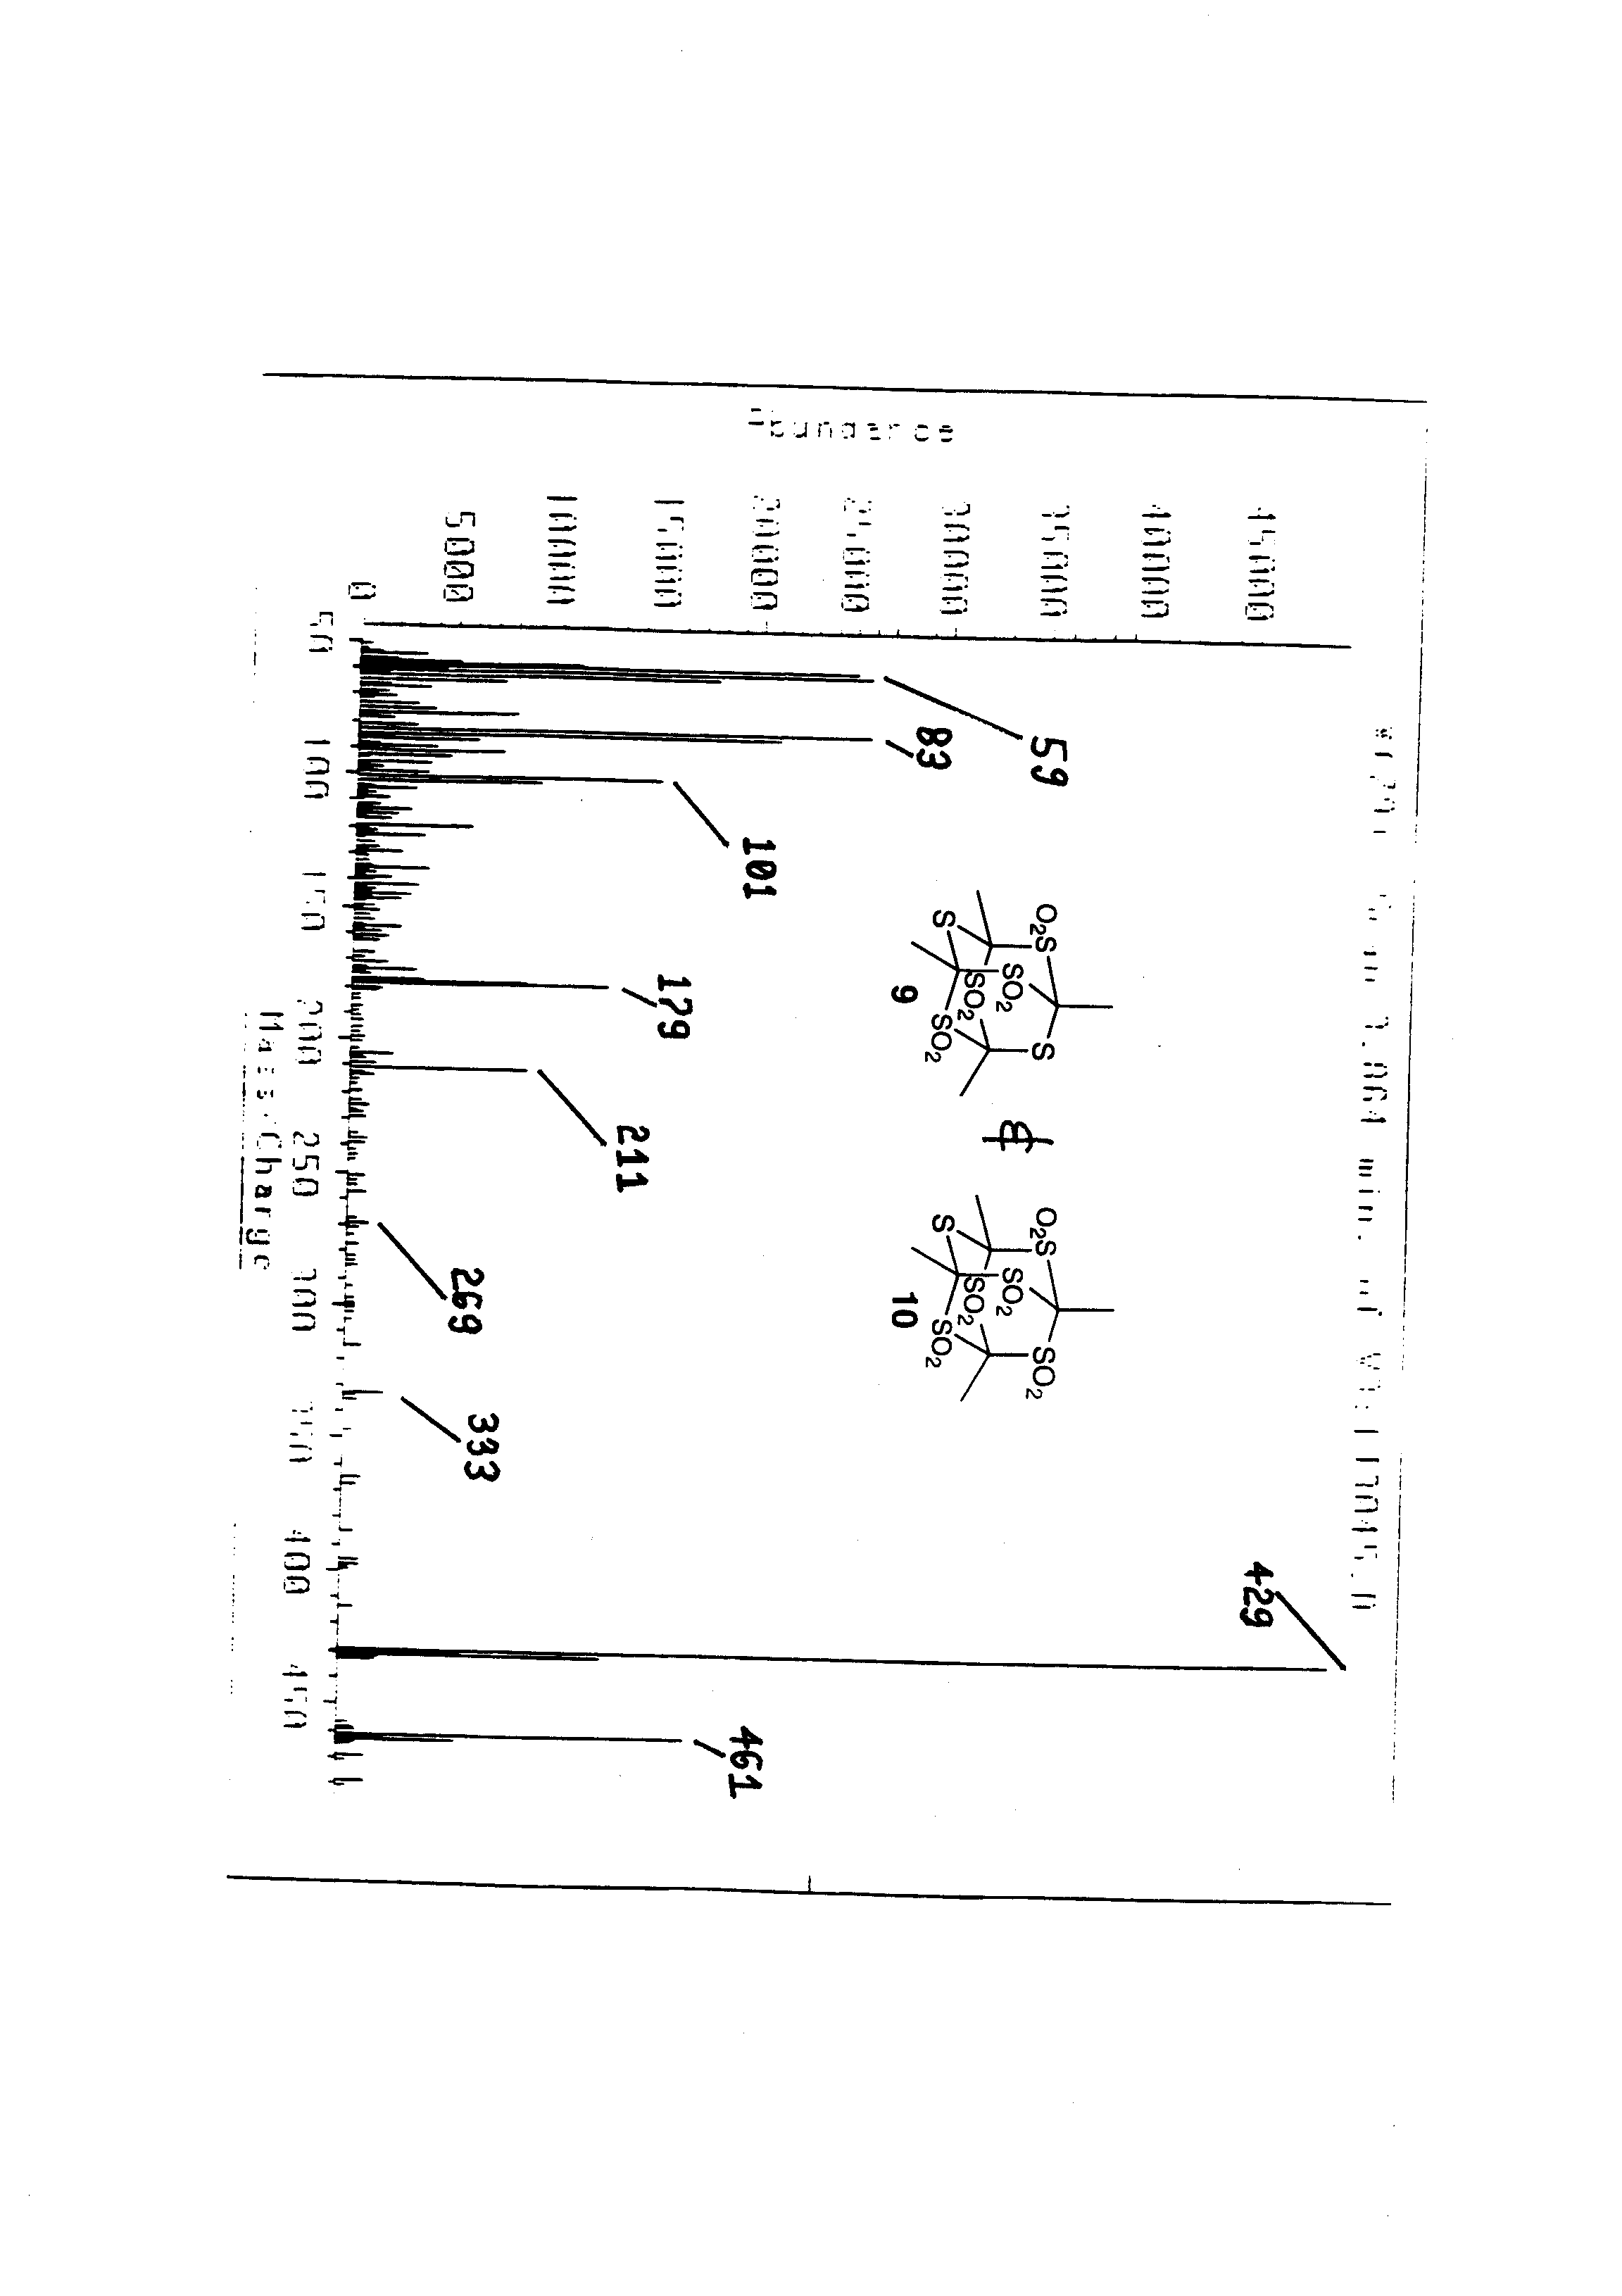
**

**
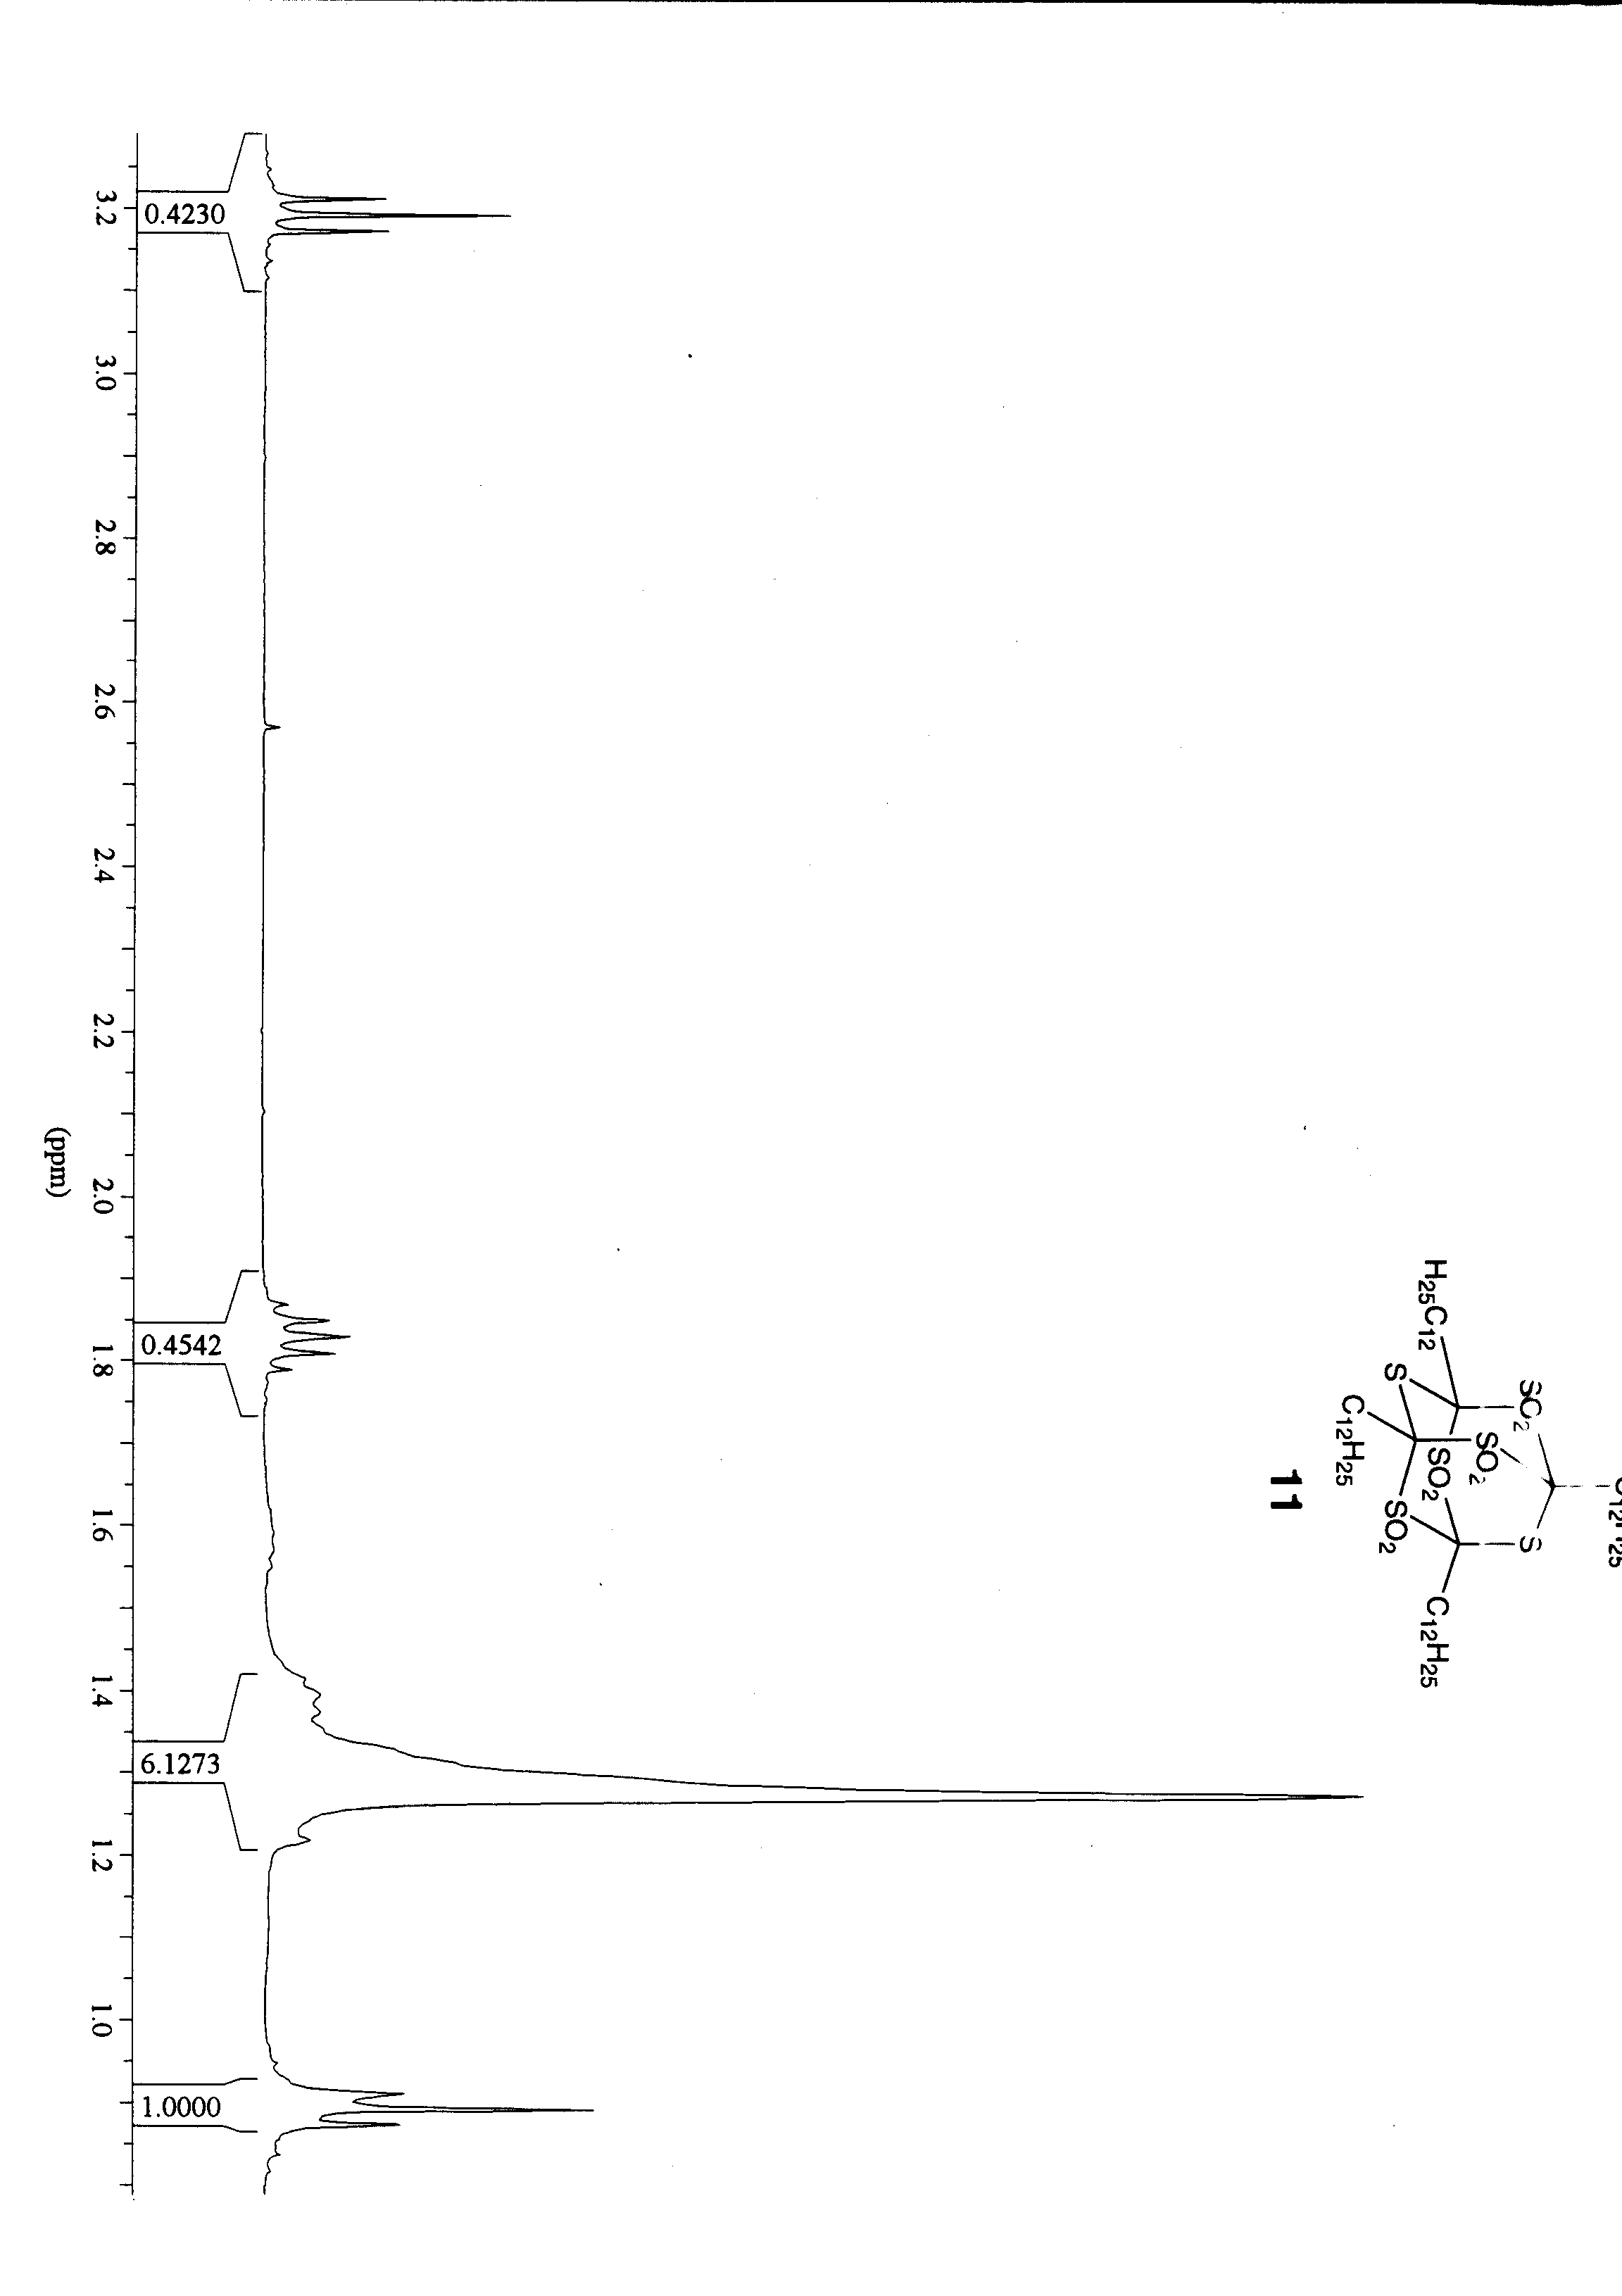
**

**
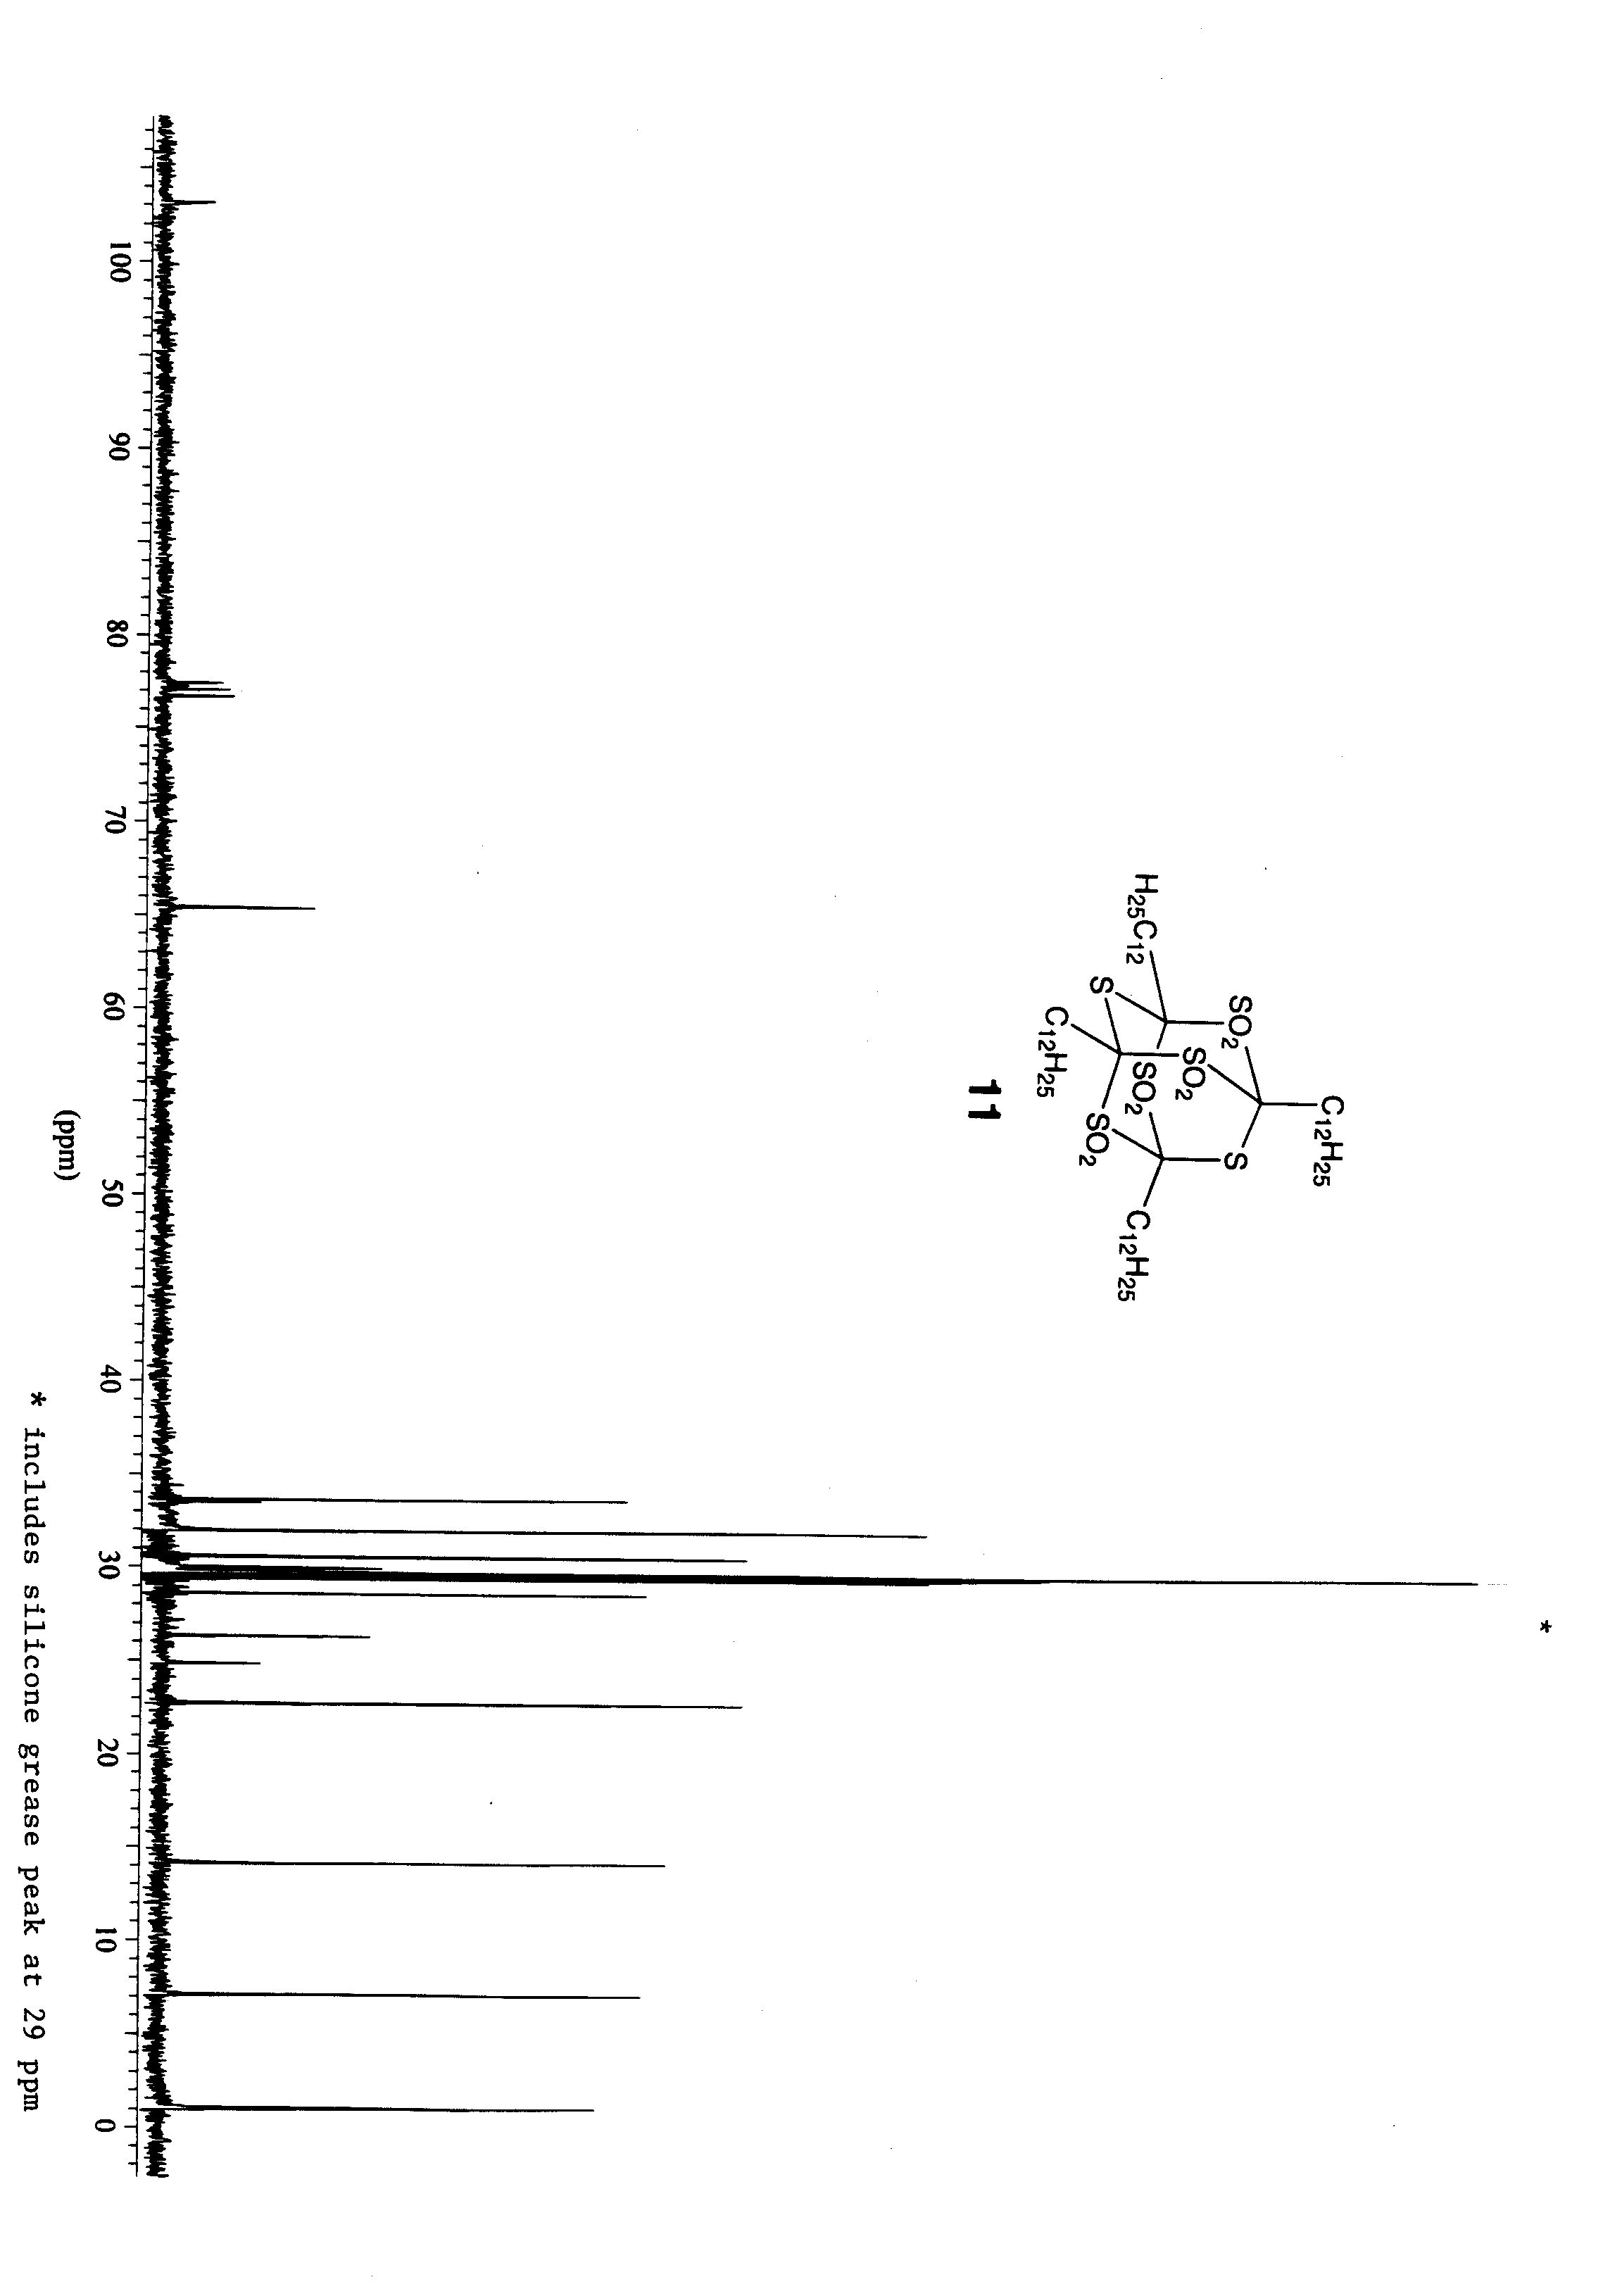
**

**
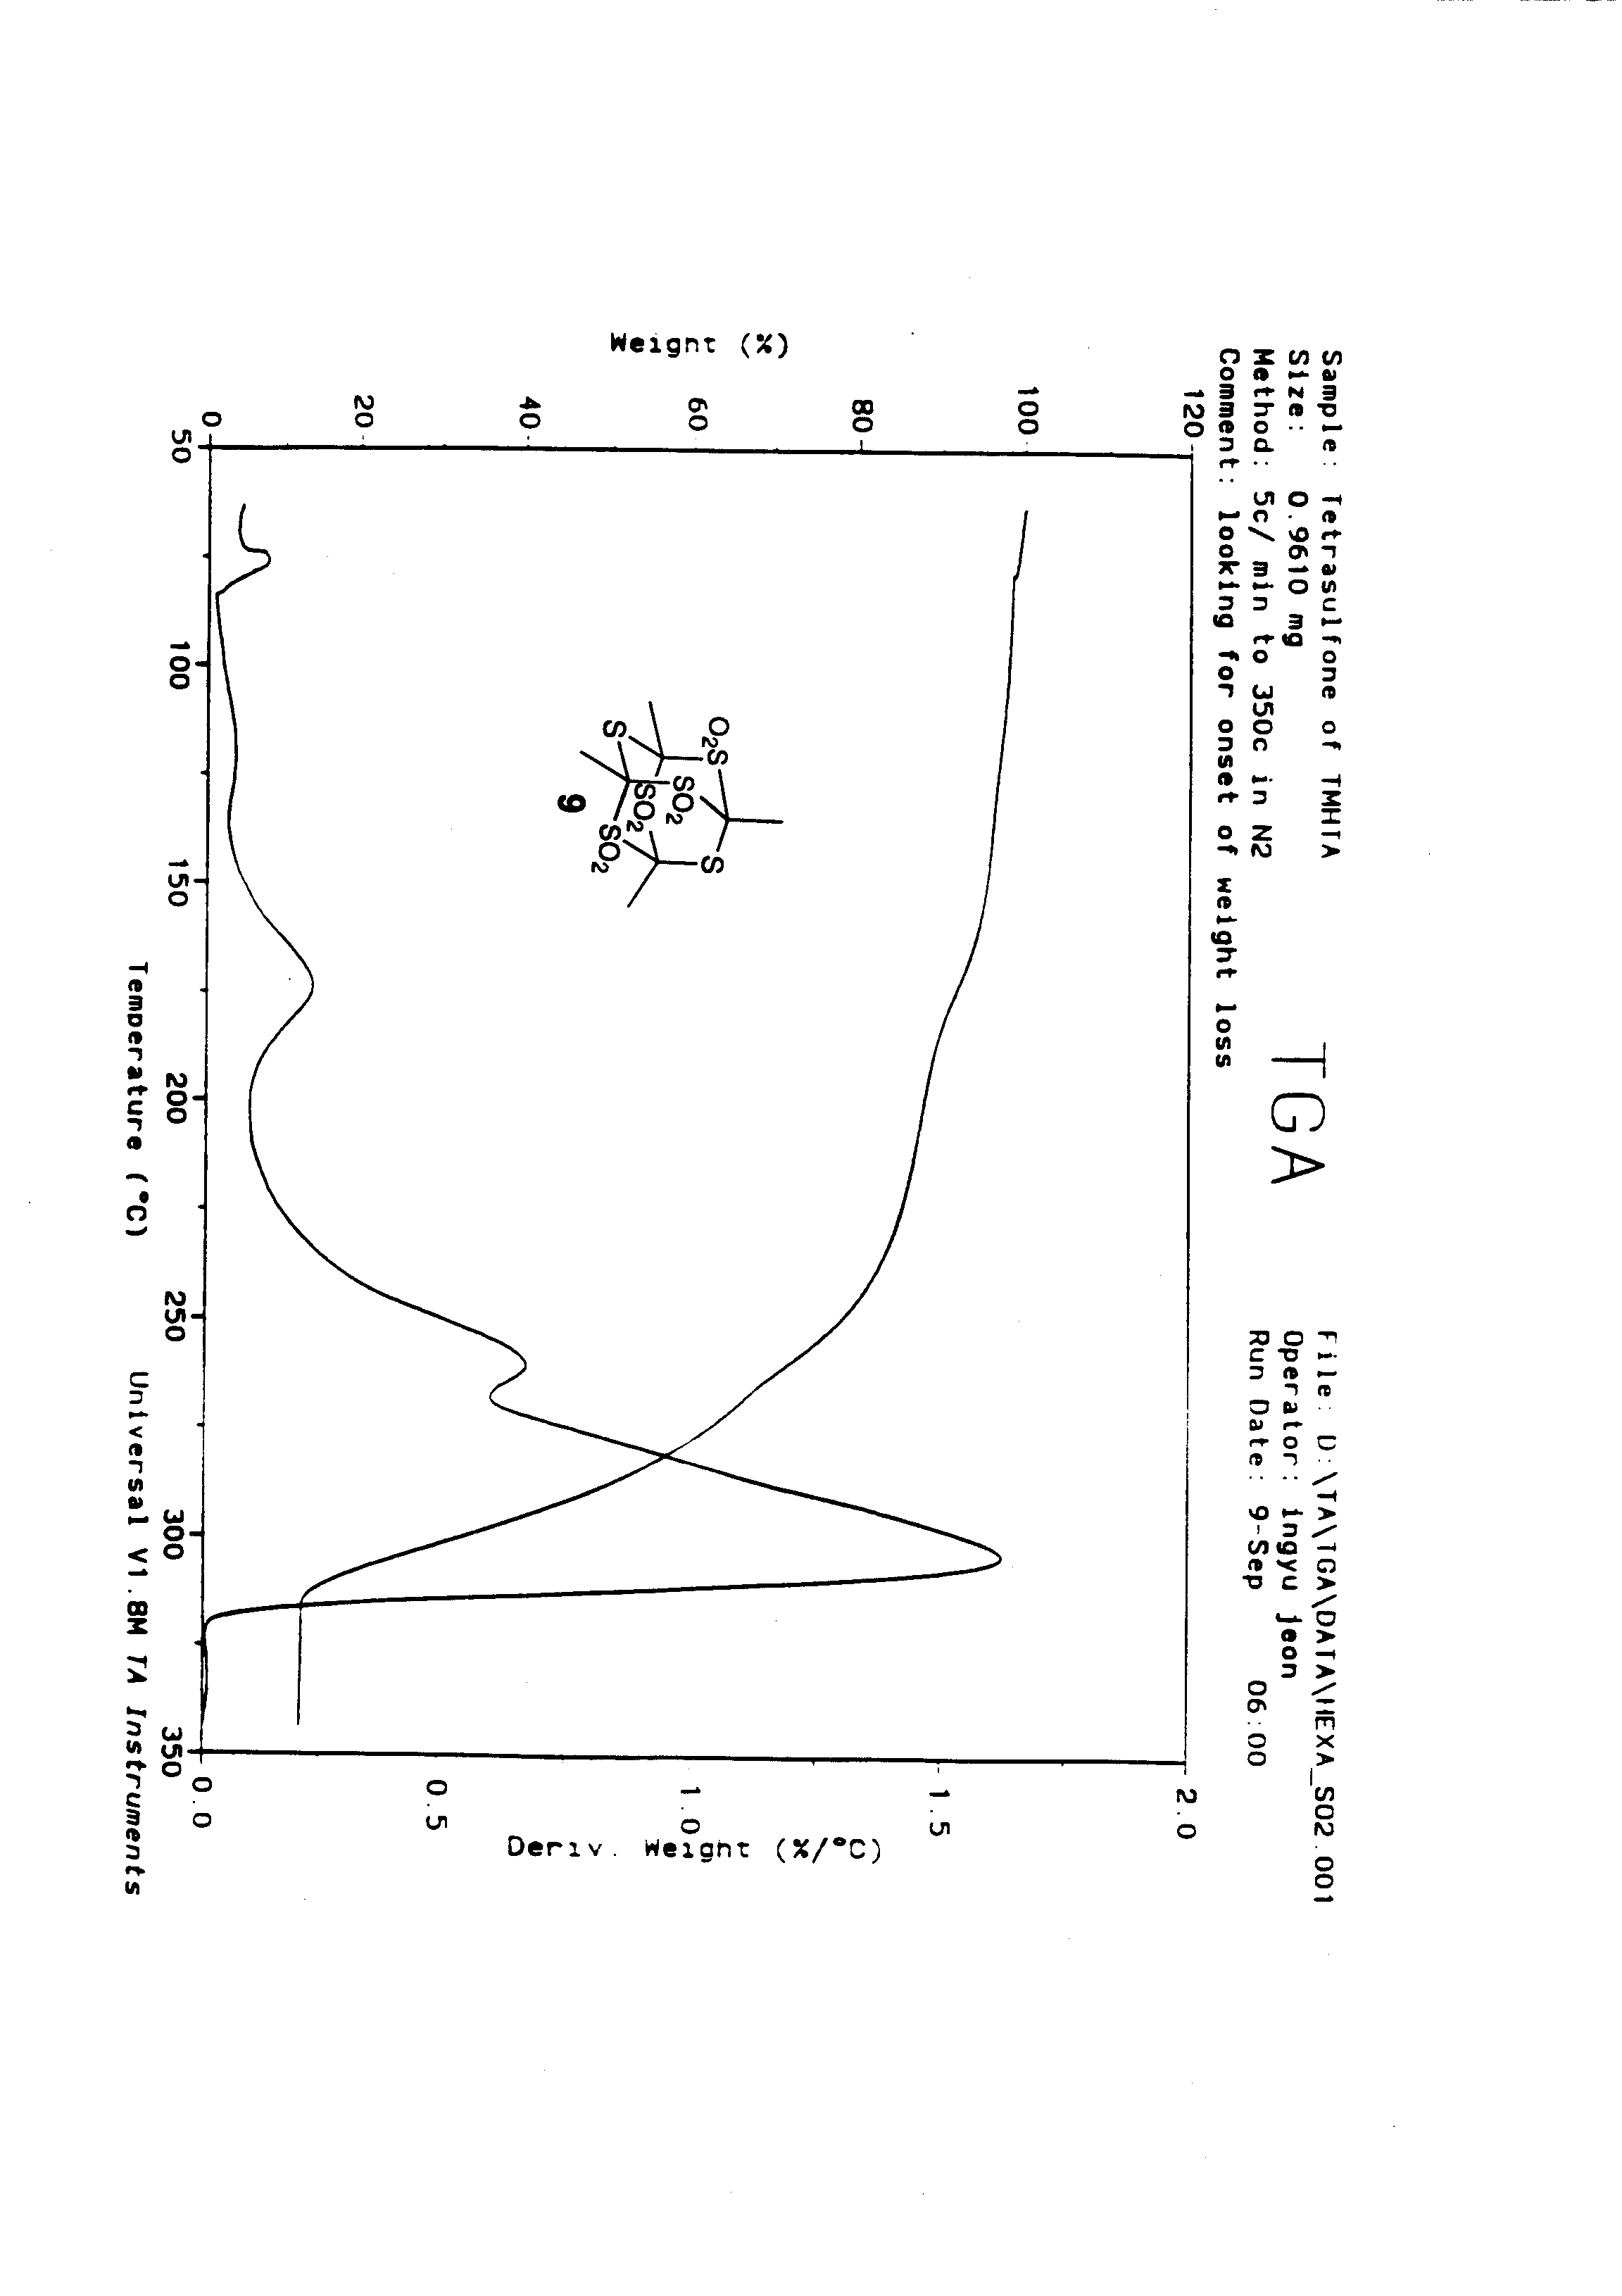
**

**
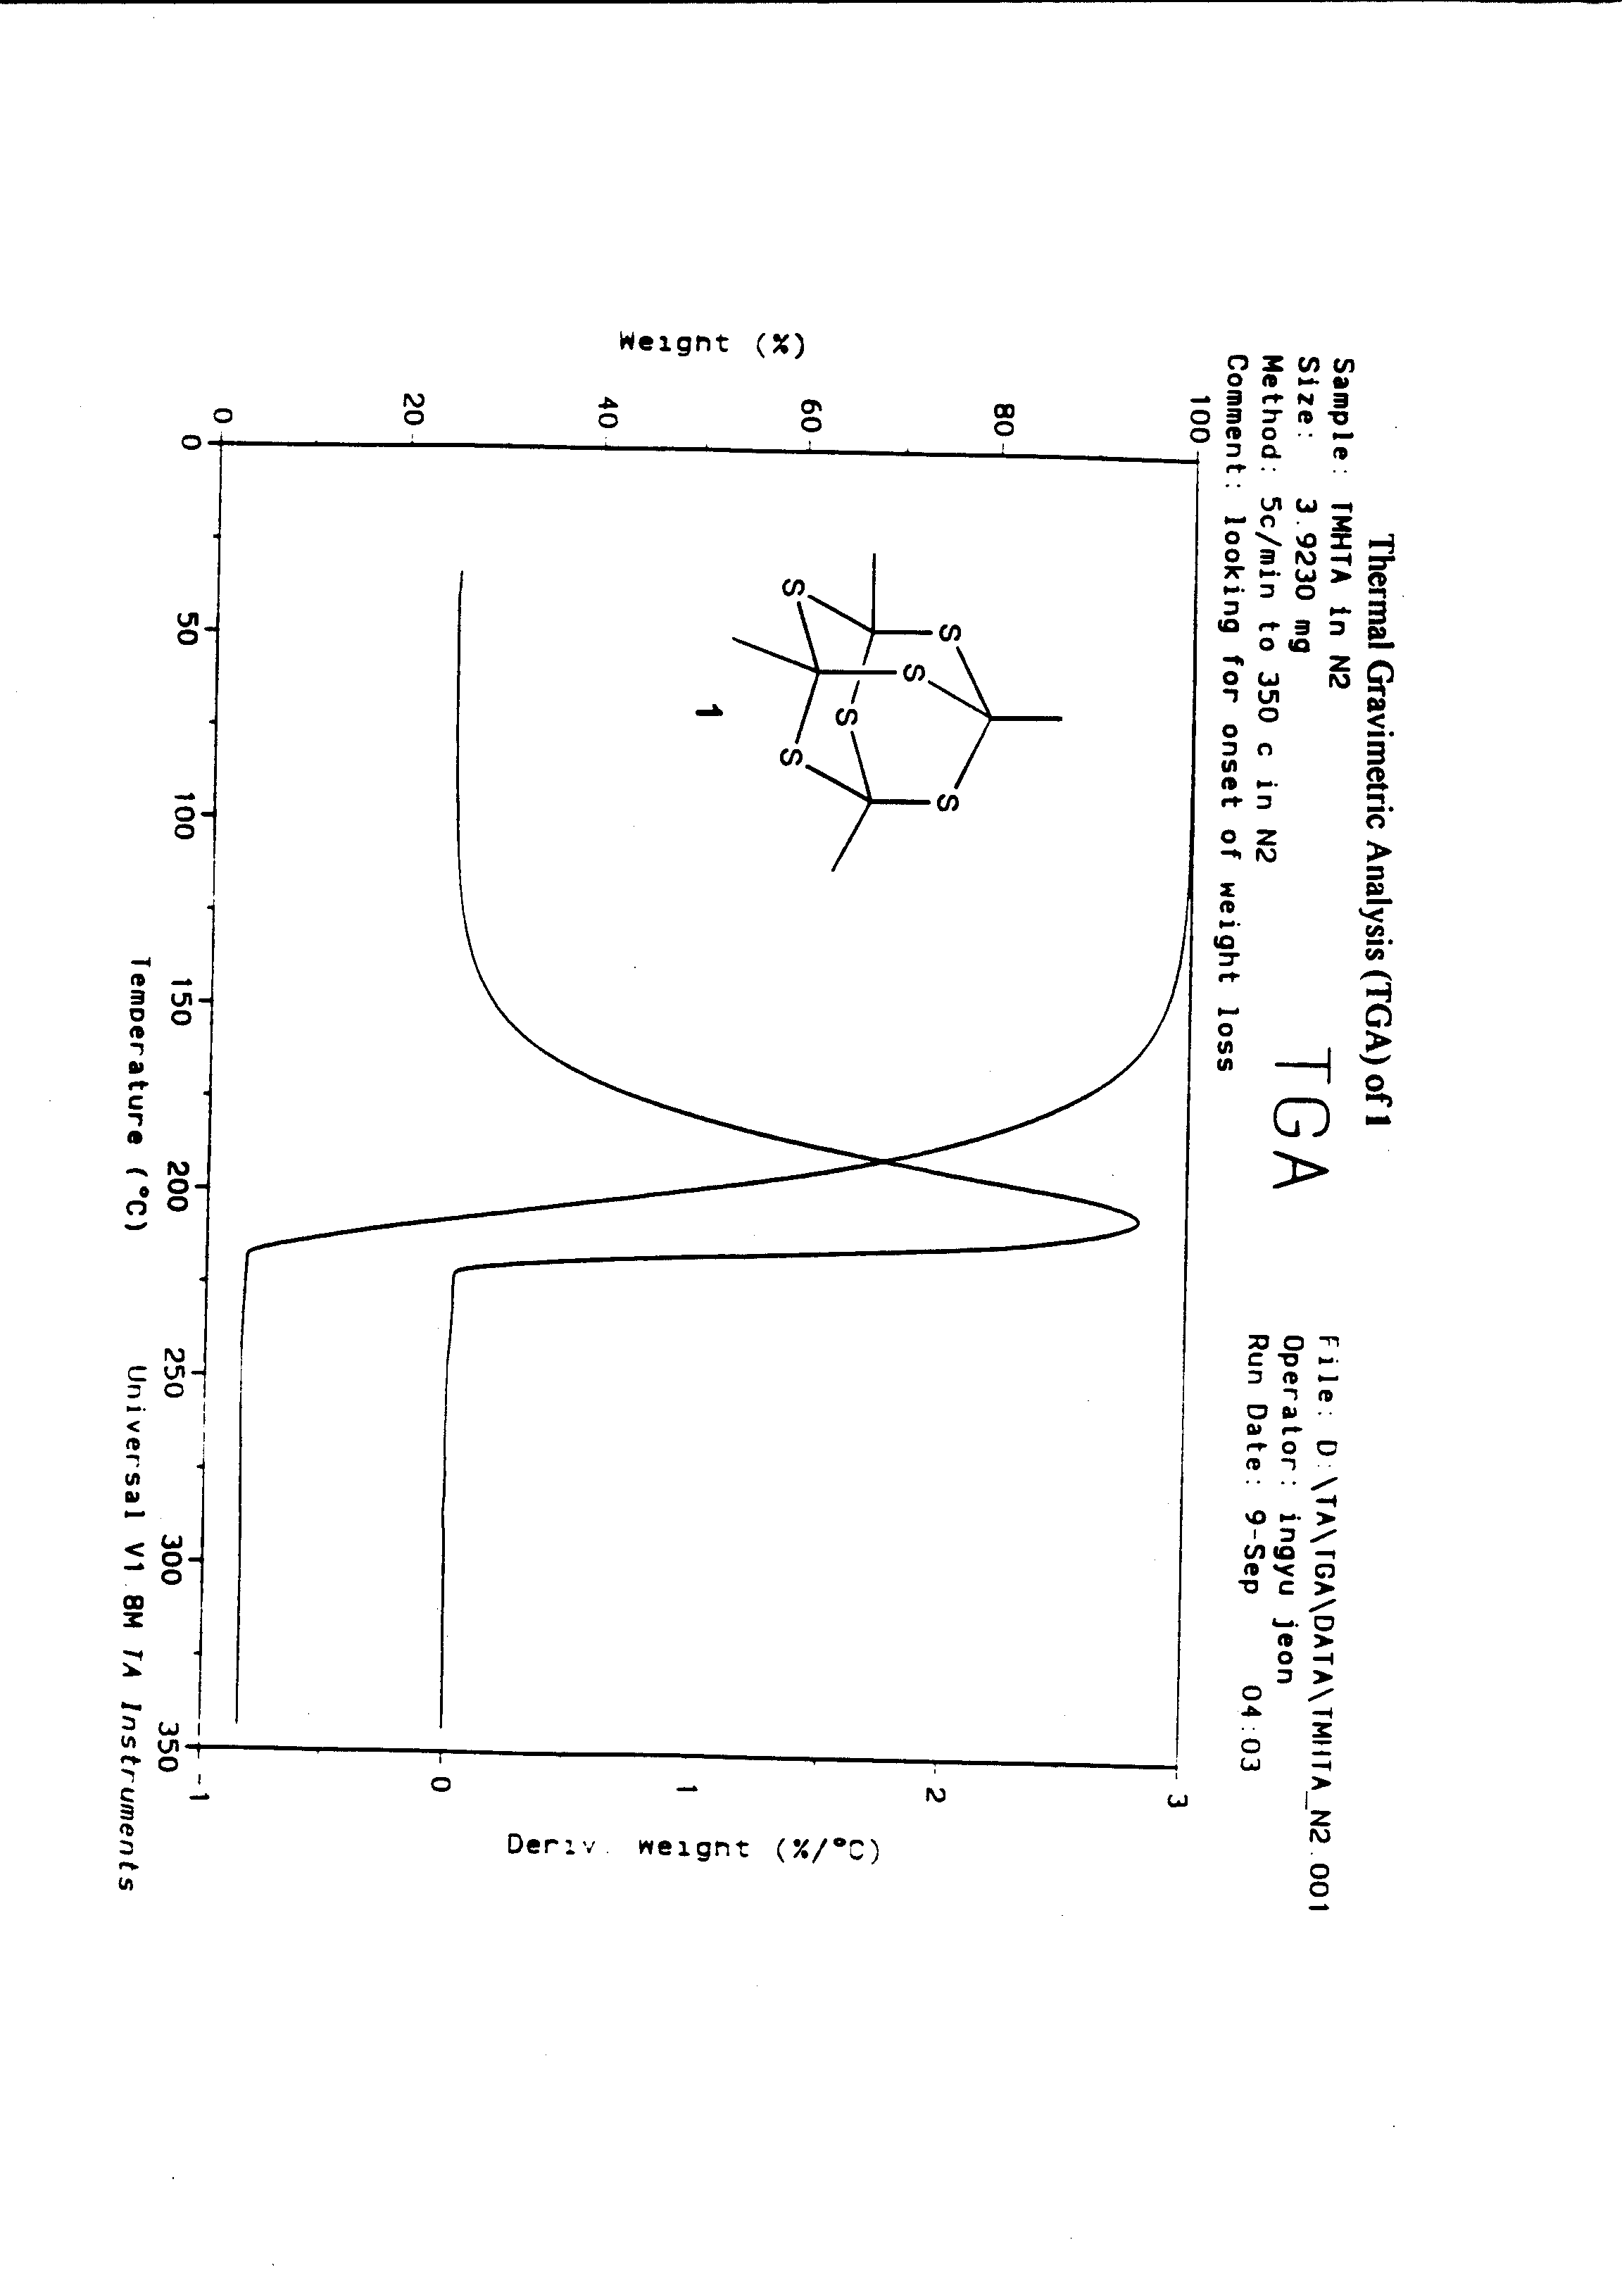
**

**
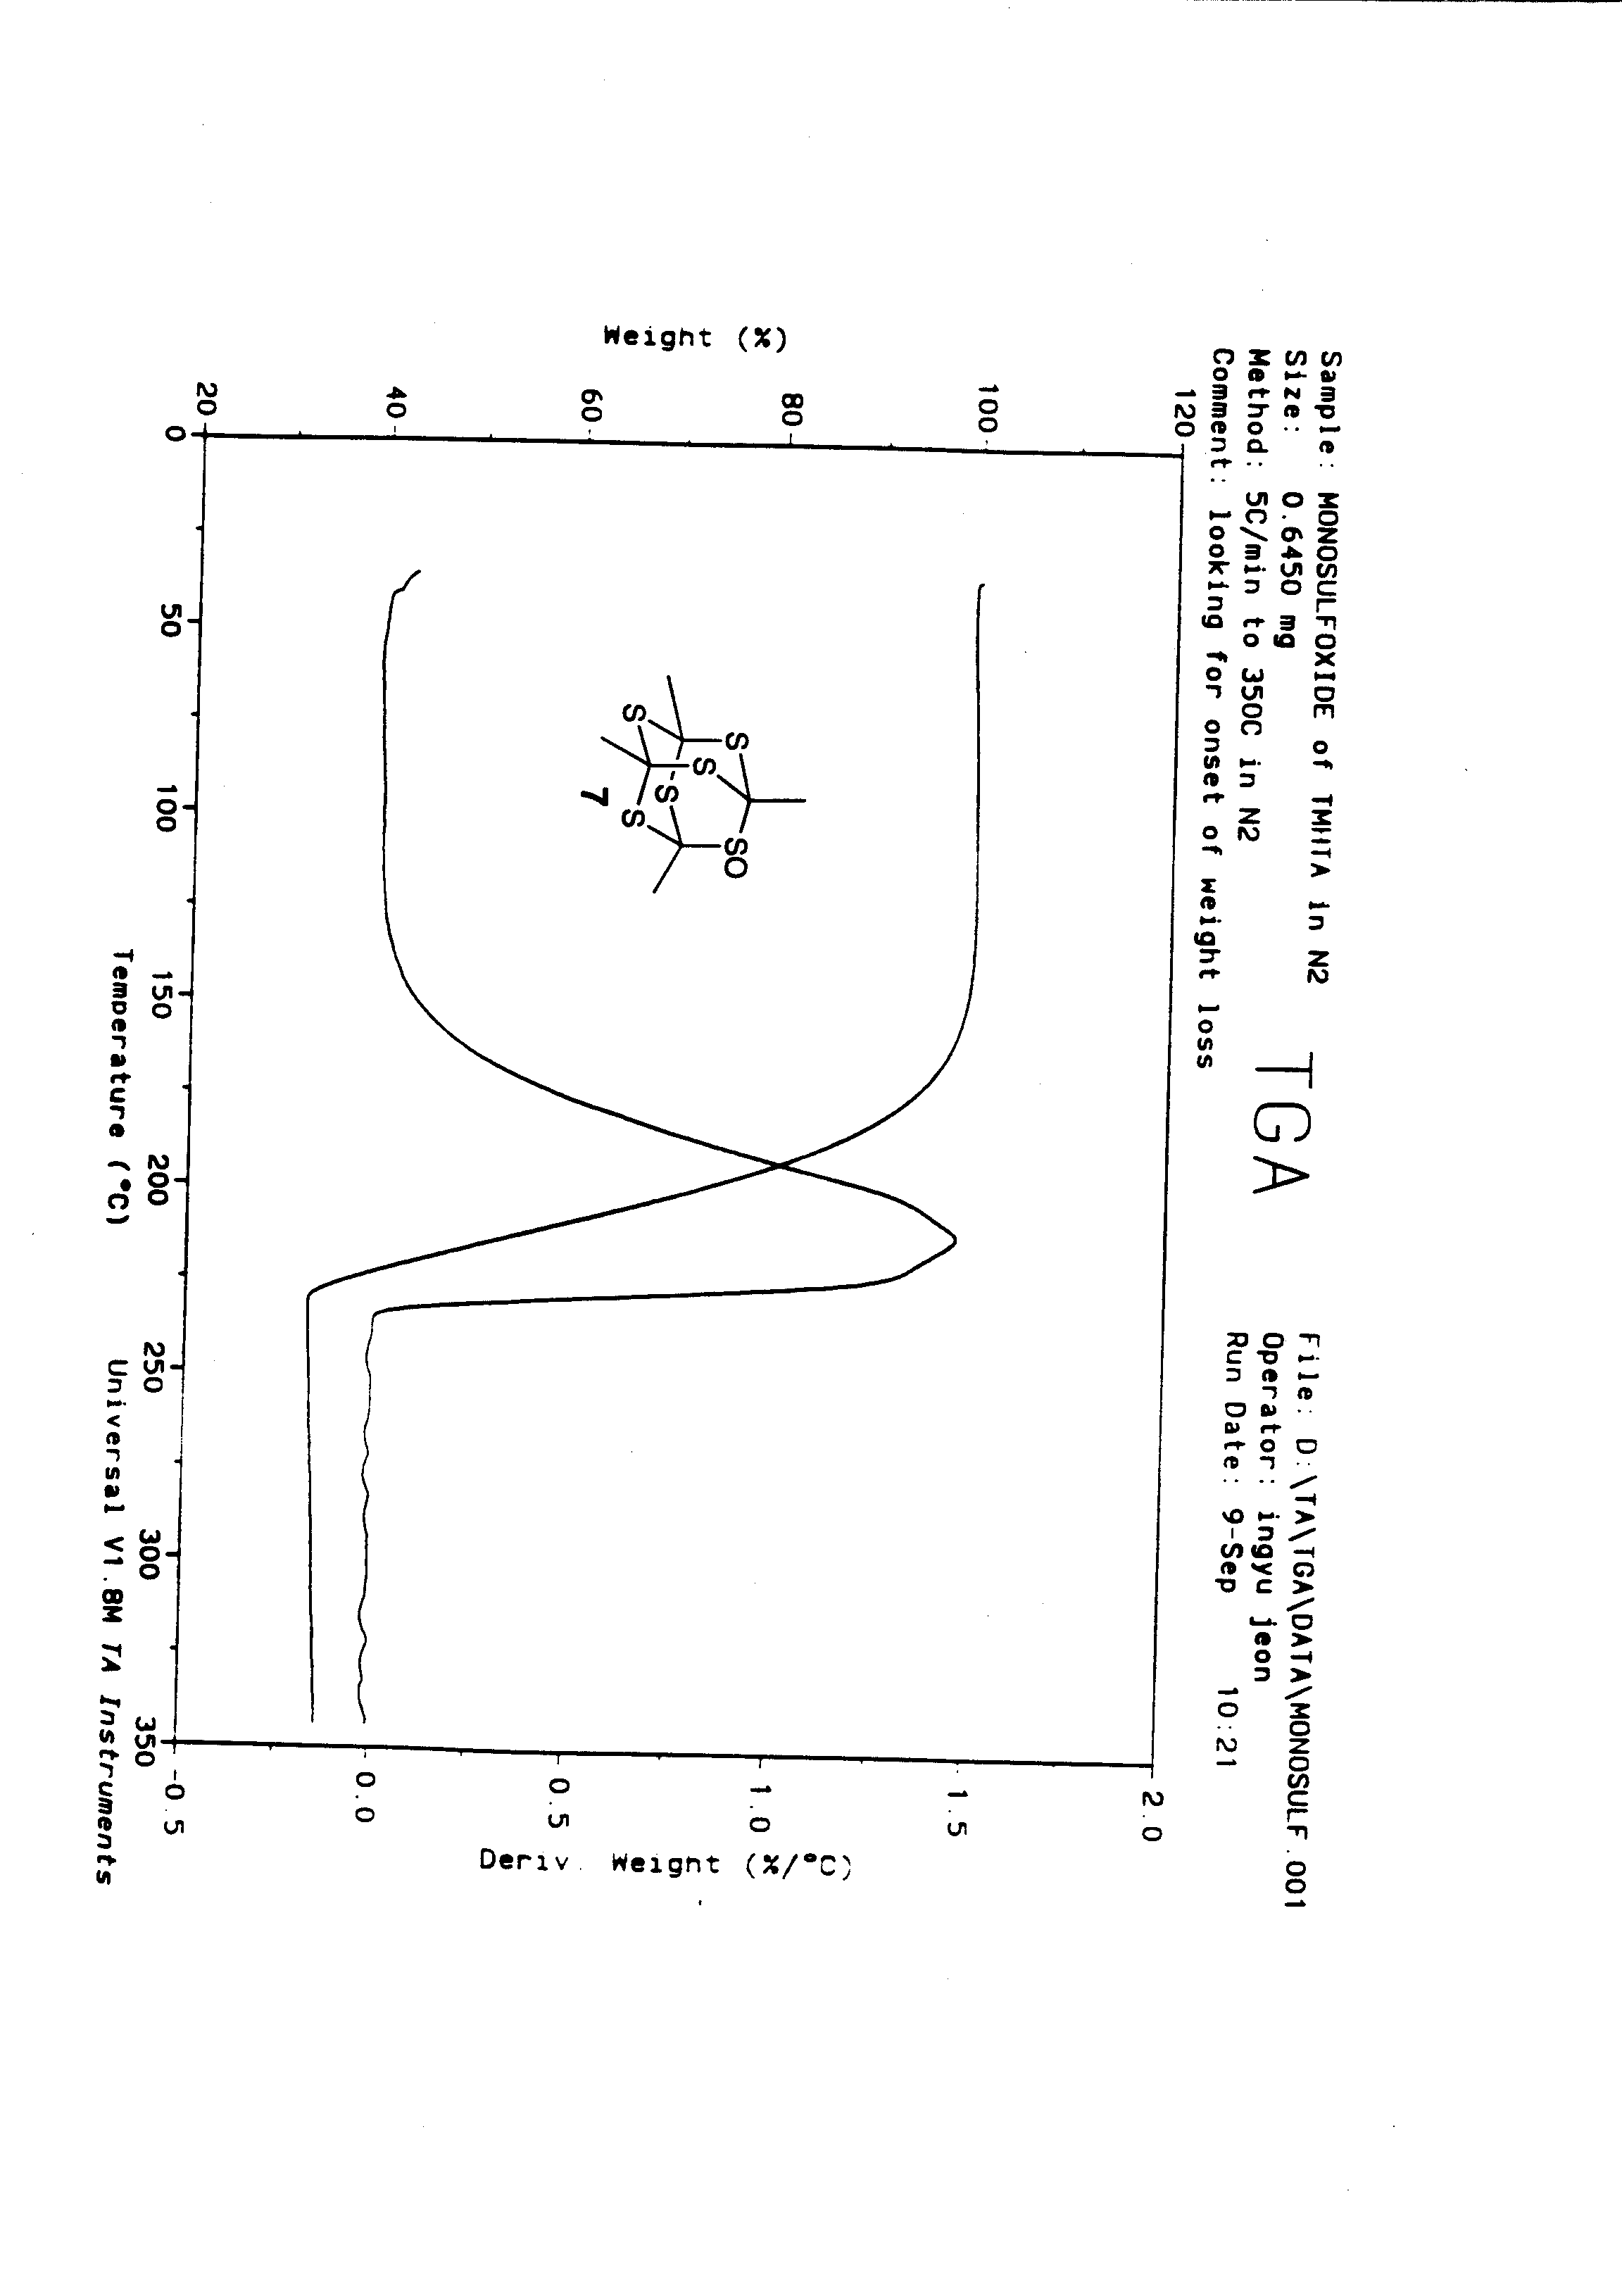
**
